# Supplementary material
Source: ML conference proceedings conference paper supplement (https://proceedings.neurips.cc/paper_files/paper/2022/hash/429d69979c22b06d6baa65caf3ab1e10-Abstract.html)
Supplement: Supplementary file 1 [file 429d69979c22b06d6baa65caf3ab1e10-Supplemental-Conference.zip]

Archive with 30 entries (22 files):
- NeurIPS_supplement/
- NeurIPS_supplement/Supplement - How Sampling Impacts the Robustness of Stochastic Neural Networks.pdf
- NeurIPS_supplement/code/
- NeurIPS_supplement/code/1_train_models.py
- NeurIPS_supplement/code/2_create_adversarials.py
- NeurIPS_supplement/code/3_run_conditions_smooth.py
- NeurIPS_supplement/code/4_run_linear_conditions.py
- NeurIPS_supplement/code/5_eval_accuracy_wrt_inference_samples.py
- NeurIPS_supplement/code/6_eval_gradient_variances.py
- NeurIPS_supplement/code/7_eval_prediction_variance.py
- NeurIPS_supplement/code/Figure2.ipynb
- NeurIPS_supplement/code/LICENSE
- NeurIPS_supplement/code/README.md
- NeurIPS_supplement/code/config.py
- NeurIPS_supplement/code/data/
- NeurIPS_supplement/code/data/adversarial/
- NeurIPS_supplement/code/datasets.py
- NeurIPS_supplement/code/models/
- NeurIPS_supplement/code/models/CIFAR10/
- NeurIPS_supplement/code/models/FashionMNIST/
- NeurIPS_supplement/code/models/FashionMNIST/model_BNN_FashionMNIST_50_9999_0.bin
- NeurIPS_supplement/code/models/FashionMNIST/model_IM_FashionMNIST_50_9999_0.bin
- NeurIPS_supplement/code/models/FashionMNIST/model_SNN_FashionMNIST_50_9999_0_0.05.bin
- NeurIPS_supplement/code/models/FashionMNIST/model_SNN_FashionMNIST_50_9999_0_0.1.bin
- NeurIPS_supplement/code/models/FashionMNIST/model_smooth_BNN_FashionMNIST_50_9999_0_0.1.bin
- NeurIPS_supplement/code/models/FashionMNIST/model_smooth_IM_FashionMNIST_50_9999_0_0.1.bin
- NeurIPS_supplement/code/networks.py
- NeurIPS_supplement/code/requirements.txt
- NeurIPS_supplement/code/results/
- NeurIPS_supplement/code/utilis.py
