# Supplementary material
Source: ML conference proceedings conference paper supplement (https://proceedings.neurips.cc/paper_files/paper/2022/hash/429d69979c22b06d6baa65caf3ab1e10-Abstract.html)
Supplement: Supplementary file 1 [file 429d69979c22b06d6baa65caf3ab1e10-Supplemental-Conference.zip › NeurIPS_supplement/code/Figure2.ipynb]

# %% [code]
import numpy as np
import matplotlib.pyplot as plt
import pandas as pd
from pathlib import Path
import seaborn as sns
sns.set(font_scale=1.2)
import torch
import torch.nn as nn
import matplotlib
import os
import matplotlib.pylab as pylab

plt.figure(figsize=(20,8)) 


def generate_directions(mu, sigma, number):
    directions = []
    for i in range(number):
        grad = mu + np.random.normal(np.zeros_like(mu), np.ones_like(sigma) )*sigma
        directions.append(grad)
    return directions


def unit_vector(vector):
    """ Returns the unit vector of the vector.  """
    return vector /(np.linalg.norm(vector)+1e-20)


def angle_between(v1, v2):
    """ Returns the angle between two vectors.  """
    v1_u = unit_vector(v1)
    v2_u = unit_vector(v2)
    return np.arccos(np.clip(np.dot(v1_u, v2_u), -1.0, 1.0))*(180/np.pi)

# %% [markdown]
# Figure 2

# %% [code]
# Calculate the empirical expectred angle between draws from the same distribution

mus= []
sigmas = []
all_angle = []
np.random.seed(1234)

change = [0, 0.2, 0.4, 0.6, 0.8, 1 ,1.2, 1.4, 1.6, 1.8, 2,2.2,2.4, 2.6, 2.8, 3, 3.2, 3.4, 3.6, 3.8 ,4, 4.2, 4.4, 4.6, 4.8, 5, 5.2, 5.4, 5.6, 5.8,6, 6.2, 6.4, 6.6, 6.8,7, 7.2, 7.4, 7.6, 7.8, 8 , 8.2, 8.4, 8.6,  8.8, 9, 9.2, 9.4, 9.6, 9.8,10]

for factor_mean in change: 
    for factor_std in change: 
        mu = np.random.uniform(0,1*factor_mean, 1000)
        mus.append(np.linalg.norm(mu))
        sigma = np.random.uniform(0,1*factor_std,1000)
        sigmas.append(np.mean(sigma))

        a = generate_directions(mu, sigma, 10000)
        b = generate_directions(mu, sigma, 10000)
        angles = []
        for j in range(10000):
            ang = angle_between(a[j], b[j])
            angles.append(ang)
        mean_calc = np.mean(angles)
        all_angle.append(mean_calc)

print(f'angle {all_angle}')
print(f'mus {mus}')
print(f'sigma {sigmas}')

df = pd.DataFrame({'mu': mus,
                   'sigma': sigmas,
                   'angle': all_angle})
sc = plt.scatter(df.mu, df.sigma, s=40, c=df.angle, cmap='Greens')
plt.xlabel("Length of mean vector")
plt.ylabel("Average standard deviation")
plt.colorbar(sc)

# %% [code]
# copied results to change the style

angle = [90.0, 89.99908244208599, 90.00260825471734, 89.99985267265386, 90.02231540094874, 90.01960073248122, 90.01382021510952, 90.01401813982609, 90.02358857115232, 89.9542587511245, 90.00499427095544, 90.01739355468425, 89.98970539628957, 89.98505961291303, 90.02015638896673, 89.9766800304786, 90.02089145556727, 90.00279363648586, 89.98646176493342, 90.00726202861438, 89.98738578940608, 89.96340063066161, 89.9889562789975, 90.00168274879405, 89.99309694965426, 90.01521400685283, 89.97079466605776, 89.97513424866199, 89.97245078983354, 90.02284398879067, 90.00302192068668, 90.01813263919738, 90.02439580359301, 90.02170572109519, 90.01704246939961, 90.00684341032351, 89.95848455287495, 89.96407512841999, 90.00210104016736, 89.96334172677115, 90.00932852045817, 90.023989045498, 89.99811059453019, 90.01518455475227, 89.95473906729163, 90.02968835849592, 90.03584820970143, 90.02337996299332, 90.02337978118027, 89.99231387341507, 90.01329875565986, 1.2074182697257333e-06, 61.08444583008059, 78.50725180613156, 84.35603047176144, 86.52934256524391, 87.71753906270244, 88.3540211376684, 88.78445934193074, 89.12225987810785, 89.34504372772967, 89.4830604766515, 89.4997410845803, 89.60314375452812, 89.63461236042212, 89.72907141792328, 89.75409398319088, 89.76260743298151, 89.79838389876319, 89.87374510651117, 89.80975628286984, 89.85440801136444, 89.88692361352379, 89.874558631157, 89.90495417750358, 89.87670544642869, 89.87083906396154, 89.91573324922439, 89.9301652893095, 89.9252701182402, 89.88224454716381, 89.94409161529778, 89.95646920341872, 89.9390883655067, 89.9786087799587, 89.96760551111471, 89.95826614315254, 89.98102096202169, 89.9919892858574, 89.97256459846626, 89.95853031596083, 89.99041678611103, 89.97235122300951, 89.99459035870154, 89.94264800620992, 89.94815191712894, 89.95335061571873, 89.93313144050475, 90.00710638857193, 89.93691468933409, 89.9960730358135, 89.97903754823045, 0.0, 36.33286166903908, 60.177171511704636, 70.6446785808072, 78.67821012574403, 82.13167613804434, 84.09887283594695, 85.86989124964757, 86.38163769135194, 87.1586893713509, 87.76830225557721, 88.25300920909511, 88.44294834261044, 88.70506098670931, 88.82673951828035, 88.91128312604553, 89.12455457842155, 89.28409641695262, 89.34461109069233, 89.32613876137658, 89.43345500731068, 89.49208946681188, 89.52805727905576, 89.55856571743894, 89.59542699688869, 89.66596851353022, 89.61412292783233, 89.67479907317606, 89.70941029848578, 89.6895398942204, 89.76722558903683, 89.76366165288928, 89.77070948603227, 89.8159662287658, 89.83394283559993, 89.81595449331152, 89.81952447117008, 89.81312174407884, 89.84798882857882, 89.83666423341063, 89.8724693495889, 89.91081790699981, 89.87247748799409, 89.88877196820935, 89.90397711401239, 89.86924902623444, 89.86607646569097, 89.89181148010059, 89.89575954316923, 89.92532995557067, 89.90882764016355, 0.0, 25.21071320742925, 45.93063277290731, 60.43327461728683, 69.10090986902829, 74.35993634059486, 78.55978197677676, 80.55249739817761, 83.08706412400878, 84.43762228369557, 85.08101982541591, 85.7596159325576, 86.60269622985928, 87.14820340166567, 87.3014400976706, 87.78728455762102, 88.07160151677178, 88.32508385447278, 88.43824328431725, 88.6350403928245, 88.7933775361744, 88.85366531682908, 88.90015445359447, 89.01867777220373, 89.10915943790445, 89.22740217324032, 89.2011343235271, 89.35187326434632, 89.39570760051093, 89.35234340803935, 89.41675426423589, 89.45801415605192, 89.46050918967313, 89.51668056003633, 89.5631932724136, 89.59164114338728, 89.59242323738567, 89.56858783615023, 89.6323979873861, 89.68173083364103, 89.68921400798668, 89.70025111637572, 89.73806910562487, 89.70964981072825, 89.72829635645208, 89.76759513600028, 89.73360144966333, 89.78062666541138, 89.72152102304268, 89.73575043970986, 89.80736710370816, 0.0, 19.182724859153552, 36.35141206764714, 49.79975651510979, 60.0235109225041, 67.05456426173015, 72.87884291328417, 75.79838186039447, 78.47492119464835, 80.3582342432737, 82.19621512666093, 83.5173155145534, 83.93842928210474, 84.74232675084171, 85.73238257997527, 86.26830123831648, 86.67359878733014, 87.03557766555531, 87.27892317662598, 87.63940038993665, 87.78463501557175, 88.03470841043787, 88.3146246937439, 88.39602594245751, 88.45924049582388, 88.60709608681402, 88.66216237881257, 88.78545241094174, 88.79875449283111, 88.8774816823165, 88.90065721833827, 89.09760543168797, 89.1111172258913, 89.2315193473209, 89.18527385763777, 89.26373244845324, 89.23052650389319, 89.3548876780082, 89.41654280464955, 89.39375179053792, 89.47915246744903, 89.51390860977845, 89.46477204514376, 89.49636510693044, 89.53533336825686, 89.56146781042135, 89.59622867169645, 89.55694374430175, 89.59963550662529, 89.63523945887384, 89.63366926915963, 0.0, 16.2034973227416, 29.968206129690504, 41.918014611443105, 52.91110743208292, 60.90773383416638, 66.57097499701982, 70.60964037999798, 73.87340912479553, 76.30059031940503, 78.87415384067187, 80.72637373695062, 81.6561033042342, 82.86397237278811, 83.39513059124299, 84.02538356581621, 85.1232261599532, 85.40810590012262, 85.9349481588196, 86.27045525422596, 86.70940268747809, 86.9803028756349, 87.05972421311564, 87.1571857837721, 87.54006085919323, 88.00151674015157, 87.97911515343613, 88.03328559340348, 88.18616147566806, 88.27498142767539, 88.5336597908341, 88.36560793537278, 88.55948908030595, 88.68939163234593, 88.6813203638704, 88.93006221162419, 88.96812267264826, 88.8912182478867, 89.06240713076896, 89.0145065148478, 89.08659846060797, 89.13411290140732, 89.23222774356076, 89.19227353629235, 89.2733779101485, 89.34834366978849, 89.30897702846816, 89.34759152437493, 89.39760123524576, 89.42609097338145, 89.42450123581386, 8.537736462515943e-07, 13.717398025052761, 26.522439285039237, 36.3646576095245, 45.73462524346617, 53.25717533487415, 59.70939070437198, 64.31892929494747, 68.94897065677068, 71.86680635122755, 74.18914095564061, 76.95994640585323, 78.35635905771565, 79.84325955871229, 80.92579296172833, 82.34292492944529, 82.58208491142918, 83.47982170146655, 84.23245724212244, 84.83280685158797, 85.42753613922862, 85.4674404837719, 86.15495851492001, 86.35426689444469, 86.62007145829746, 86.6089848178719, 87.15904108708011, 87.22204853083348, 87.44210670597114, 87.6439149520006, 87.78890417802172, 87.95535043328553, 88.05346032378715, 88.05993236926659, 88.25000685267565, 88.37957422360506, 88.51960633407235, 88.50071132878091, 88.59664560008565, 88.64234545936698, 88.6311786659513, 88.77866176840955, 88.79344384467325, 88.86983030036856, 88.92436840056915, 89.04410898013946, 89.04493812992719, 89.13564919155185, 89.07523700592527, 89.18591074601294, 89.16216408610705, 0.0, 11.268590315719132, 22.33207957819422, 31.83998137907591, 42.347211882408885, 48.20351424612667, 54.91572628757225, 59.78459271636858, 64.44913146037071, 68.49467190101137, 71.30663594103905, 73.7538867560484, 75.69556989741292, 77.10873761300495, 78.75670147828103, 79.66761781419967, 80.64300122943607, 81.25486241338388, 82.26437931033755, 82.89661193163394, 84.06488735664641, 84.0753876830474, 84.77401357575745, 84.97774774314703, 85.71141915506075, 85.99386147423198, 86.18656724797378, 86.3829807937845, 86.6611357644668, 86.8931635879563, 87.05713092646879, 87.23007182608924, 87.21566293679182, 87.60994714908283, 87.79152026296222, 87.63063243665006, 87.87689213930143, 88.03687421450927, 88.07202930157979, 88.13784927783735, 88.2794709832362, 88.21144753680616, 88.41509015273591, 88.54840597582485, 88.51364061896366, 88.53387612593222, 88.81038886529184, 88.85138612317333, 88.71295772653932, 88.81636112302436, 88.87091312409706, 0.0, 10.138822815444293, 20.093990850422816, 29.44457414083064, 36.54521596599021, 44.280687726226155, 50.20798574302176, 55.628930149800446, 59.27246600506855, 62.61068123108621, 67.14039092253728, 70.4898761867938, 71.4563466007781, 74.36928363340934, 75.47262881047692, 77.00351539635164, 78.47157374175931, 79.0652429138416, 80.17458078038828, 81.44810710586084, 82.1878781449539, 82.43731481971007, 83.2476943666567, 83.97093507745318, 84.34642988831568, 84.80550776043422, 85.26633238610707, 85.0420795247224, 85.82604794882717, 85.97716917122592, 86.35795973229109, 86.41834869805264, 86.74577292857131, 86.80447264314219, 87.03635676731032, 86.81743450822202, 87.34770977327862, 87.39424977299755, 87.49789633517244, 87.65648244291324, 87.8536989028528, 87.98260273733405, 87.93834738044654, 87.99022582949642, 88.1441056971718, 88.23267494625124, 88.21061810377248, 88.30791967760113, 88.48679391143408, 88.63806577363054, 88.59140549928692, 1.2074182697257333e-06, 8.791992717132427, 17.939119871388712, 25.866088244967848, 33.160628747610104, 40.825138775072375, 46.291123140877005, 50.82924716525668, 57.0801143455215, 59.40890779339891, 64.58155554851761, 67.22733054057265, 69.28147118467787, 70.483852695285, 72.68154825851336, 75.32630297474729, 75.36637416519496, 77.79468344516559, 78.48567909470673, 79.84532045795692, 80.16179392635252, 80.83854625048937, 81.76124450499292, 82.31581597827592, 82.92766916044539, 83.71201247945498, 83.81839852097704, 84.36507447594799, 84.47744081554224, 85.03296276164696, 85.19792393059583, 85.67495468704568, 85.59866268312409, 85.93764910004965, 86.28216741347798, 86.59969234788463, 86.46988497112494, 86.78355712926513, 86.73925814872496, 87.00644368212821, 87.16105219613571, 87.32890318216306, 87.36953165117211, 87.69056995179984, 87.7017567830468, 87.8461304785193, 87.89024278070909, 87.97563092314752, 88.1125111396949, 88.2109522336072, 88.0854320134457, 0.0, 8.416286791381749, 15.989062518709677, 24.079768713172985, 30.22040421963666, 36.41236033959869, 43.13519217867561, 47.01795215642394, 51.51439927754707, 55.40990563861824, 60.014097811425195, 63.047151091038344, 66.42225250859791, 68.31612912349743, 70.05744246114641, 72.42726721090051, 73.42419125360536, 75.05807905189768, 77.0502163718417, 77.39245771759039, 78.66397417001471, 79.59811204677254, 79.65018874370341, 80.76372794430115, 81.77420791202975, 82.14942688762345, 82.71295987253528, 83.2513158352343, 83.63203053983082, 83.8158757738921, 84.05803131760203, 84.4681677992571, 84.82843803315203, 85.12485083161302, 85.54046221217425, 85.38305876498973, 85.87086556605594, 85.83797413310327, 85.9980696400998, 86.38552955109832, 86.52033741414922, 86.82042288166366, 86.94690058700668, 87.13880855253656, 87.22053177025633, 87.32595571028821, 87.39866004343477, 87.5699563126122, 87.45833110634813, 87.58243987950495, 87.93416022886971, 0.0, 7.307928991035676, 14.093892999877955, 21.02946427544528, 28.222890343436255, 34.297401489576934, 38.994013990003104, 44.12920159346575, 49.810766308971914, 52.99505142081196, 55.50392887619715, 59.782208271296355, 63.25492890201467, 64.79098888615593, 67.2577017540568, 70.0278674701184, 71.5235009076685, 73.16028682653518, 74.615105456054, 75.40707159326675, 76.36437611734105, 77.81069573203116, 78.52011738092673, 79.0460729315097, 79.80530216897529, 81.02223970150168, 81.16511469885221, 82.20895710567913, 82.57541705238131, 82.180114392086, 83.44267881472405, 83.49786656808976, 84.24831434832959, 84.23100508430986, 84.42870608285438, 85.06590366550166, 84.93963660412726, 85.32253950563262, 85.67147731807121, 86.00102889906371, 86.11700228733316, 85.80409430885197, 86.0478540595147, 86.48453264576281, 86.74865760484516, 86.68331170242006, 86.86212327981917, 87.02560312090361, 87.18151344962133, 87.26939463718593, 87.35544471382069, 1.2074182697257333e-06, 6.8309083259854875, 13.786476264487716, 20.317039875333673, 25.7616018290433, 31.376057488275528, 36.241381615288184, 42.96575374311142, 47.22600561378965, 50.65829824411617, 54.46242344790112, 55.367449770908394, 59.66051903338956, 62.13620364696526, 64.27743463825158, 67.89755972830764, 69.39418449099223, 70.04614505066614, 71.4946274563336, 72.54708357137598, 74.83954124605151, 75.73402321777526, 77.25384039038552, 77.69462173805765, 78.64779496846072, 79.16530955478383, 79.94227650502522, 80.72398511039479, 80.93201058443549, 81.34969893729298, 81.59287607581264, 82.39353820493733, 82.7228937945928, 83.14754840862737, 83.2425439916972, 83.55168063741789, 84.2852616983297, 84.36877698683907, 84.48214407305369, 84.94326241399148, 85.29911476780788, 85.15251019995569, 85.52259307767774, 85.83069446306858, 86.17620548955026, 86.14265148600232, 86.34333004103567, 86.49346160104893, 86.46339750416207, 86.86517225585031, 86.96094917831027, 0.0, 6.3835421523571245, 12.05048950102524, 17.94359670085378, 24.32765522275813, 29.8745261319821, 32.497656956291976, 39.50565380948137, 44.83434444347278, 47.27711245111919, 51.10726532702234, 54.096774267094766, 57.591141232089534, 60.19105370700388, 62.12109552791779, 63.92018965096669, 66.0640703101385, 67.51364379063413, 69.79238019085894, 72.04072157704138, 72.39118873938456, 74.16467143579216, 74.92556777651767, 74.85684811398704, 76.80158114778563, 77.12408903185528, 78.0808564428918, 78.59793851601147, 79.85561955143882, 80.91783149727782, 80.42553997263165, 81.12932106852226, 82.0462475143196, 82.178057465412, 82.21866029941306, 83.16443462203792, 83.28508782872065, 83.76335066909509, 84.03957722141678, 83.84743788439934, 84.46144851862543, 84.97941095573078, 85.21201354065741, 84.97357956772493, 85.21552085239333, 85.42287205972055, 85.76968264678123, 86.1900177694547, 86.07171506656371, 86.59430856809033, 86.58629712852627, 0.0, 5.567954263411322, 11.285713950534491, 17.58109247459784, 22.700104558727777, 27.511768953634252, 33.447680467589876, 37.54415169945246, 41.86814313075662, 44.109930463779094, 48.49818591849482, 50.02057247089427, 55.70220252293899, 56.96974671630912, 59.45123865959768, 60.877007248203384, 63.948072459880194, 65.7654804582667, 67.29906952460034, 68.78540848239818, 69.975065980301, 71.2285755953374, 73.13296619687216, 74.07462399938277, 75.02638949491634, 75.69519762220298, 78.33293741392228, 78.78178274639951, 78.85265047620719, 79.20032458897593, 79.62793541485621, 80.0981729239973, 81.18374442582048, 81.30786833596765, 81.73092258992574, 81.94600160992262, 82.57393872422278, 82.44111675911438, 83.25334208511207, 83.75689379896508, 83.4338336496371, 83.71672328272295, 84.19106305521954, 84.17419034580548, 84.73780700349784, 84.76765564484066, 85.12975375420788, 85.22965550235675, 85.23189462083397, 85.87145888740949, 85.82083555736534, 1.7075472925031886e-06, 5.3245903038190106, 10.490127800544535, 15.337569231426675, 20.89401120747897, 25.554127684543865, 30.09822464045158, 35.208683691870284, 39.10141410052566, 41.133097497256664, 45.392599596011415, 49.86611575645481, 52.525530086369486, 54.88906279011569, 57.90598514843665, 60.2571229999417, 61.633862785758765, 64.3371678324883, 65.48570281701127, 67.92911811378838, 68.34362678753625, 69.67499890395683, 70.88032240495119, 72.70242279577215, 73.76875991986701, 74.49938170982172, 75.19890921291666, 76.32975276702021, 76.82553788617626, 78.31662121884486, 78.61368430384924, 78.45154831394935, 79.36285926276717, 80.15544953274099, 80.66225412014082, 81.40486161659733, 81.73727355614763, 81.94607868140235, 82.28052284729583, 82.82112113298228, 82.85905266288701, 83.46172958196118, 83.49524310680287, 83.12927724946513, 84.18761337859556, 83.96310390287488, 84.24892427632768, 85.02153841783796, 84.94006681932206, 84.93263755895262, 85.24177351712551, 0.0, 5.159513441112667, 9.881681284631302, 14.75794823983796, 19.308988814572412, 24.52079591018814, 29.20309209527652, 32.8281119074615, 37.432989050277115, 39.728685354462556, 43.469779395112326, 46.78233574695832, 49.76599322788361, 51.77755556876356, 54.76053562886457, 58.12387894890739, 60.63399963619196, 62.13246270670043, 64.2694206066096, 64.93292358697047, 66.83681603860941, 68.92024062972187, 70.04950706267887, 71.08913391288864, 72.72366611523321, 72.49692634552447, 74.24028389464092, 73.95489267570426, 75.76777381484293, 76.13359481482237, 76.61556411220387, 78.248960416326, 79.1035061861281, 79.10629364195812, 80.16977321676568, 79.704696785263, 80.6399002383199, 81.00489146478789, 81.42569612403157, 81.44657418887131, 81.74103734352505, 82.60935331424118, 82.68062249670727, 82.92386166020536, 83.10895089737359, 83.44298515717591, 83.77873231107138, 84.4288587136522, 84.06043814511129, 84.5709597519469, 84.63949714890546, 0.0, 4.6655783851556425, 9.669368512401315, 14.191789235135849, 19.15086237064416, 22.70241601625218, 26.706024049503945, 31.341368706998537, 35.61209578416071, 39.206091117336186, 41.70130935907861, 45.32763442283084, 47.523978714950246, 49.60085154981575, 53.008672711518045, 55.05926952225729, 57.64709472342315, 59.89559491093136, 61.84817354836982, 62.40994481494791, 63.481409094363414, 67.53323200624244, 68.28184049575732, 69.92472494628586, 70.83150052453638, 70.94260773134378, 73.39473684950352, 73.12565653165683, 74.55334248704158, 74.87687456306466, 75.61172392709025, 76.82216217611352, 77.5662764063349, 78.53957820229068, 78.78535115736274, 77.98073784853781, 80.1719178656814, 79.82580432779864, 80.43952951246267, 80.2431413093013, 81.69596322883287, 81.4904113969522, 82.27252877481313, 82.06544010812077, 82.59817678778802, 82.45071004126498, 83.16486458759806, 83.49208072094609, 83.46472832788211, 83.90399395204429, 84.06053017943046, 0.0, 4.458228642072451, 8.984920779672306, 13.346699636826312, 18.253127768776512, 21.936157892961425, 25.895467850756347, 30.175007092454226, 32.537661067041725, 36.06066545201486, 39.35651112431028, 42.94902809681435, 47.25636431355904, 49.276856026919305, 51.557229635663425, 53.344095791851984, 55.82185672002727, 57.8552434648976, 59.79831367305746, 61.01682135346286, 62.86656574750511, 64.84839514465706, 66.53665760761731, 67.63060437099705, 69.60347953950061, 70.20350271240835, 70.66385579008441, 71.78118937481074, 71.87774239984253, 74.34140870673028, 74.90650611717824, 74.95588812838416, 76.56843045341643, 76.76612912554107, 77.48513429863415, 77.37527196647653, 77.94310614518959, 78.7705827229905, 79.63246047996594, 80.10977621966255, 80.45624317704755, 80.20691180843265, 81.31942464259633, 81.38536294654, 81.83441650775445, 82.27806076209086, 82.32207620057493, 82.76429981902768, 82.60971955104176, 83.04342247401598, 83.06922396267743, 0.0, 4.223051815038851, 8.544686889146455, 12.684108617765595, 16.607120937894674, 20.738305544942612, 24.580198556123886, 27.94054708490748, 31.85890518256292, 35.685486709132526, 38.83880588228147, 42.00865542944687, 44.686129266550566, 46.4577698456636, 49.15169701452513, 50.90920300498932, 54.30333762194324, 55.930645710132524, 57.82320338901277, 60.222259068681346, 61.34422985603586, 63.708017283177504, 64.42631046579044, 65.28329336332229, 66.10569200214493, 68.12770660862516, 70.82668267326108, 71.69647511846242, 72.36414760046222, 72.24130441449853, 72.34056382482163, 74.24157344802043, 75.5332277194611, 75.25562042570033, 76.33799794853185, 76.43977185559133, 77.49472594473508, 78.23892726288082, 79.23512533035196, 78.74638728481756, 79.93964828884641, 79.54582040268, 80.28078519112496, 80.63574828796403, 80.76954953910685, 81.07322471676942, 81.29629618451413, 82.32461682136682, 82.70050435886269, 82.59238678646044, 82.5751359991285, 0.0, 4.157078224198714, 7.983065934116739, 11.927571421489908, 15.966159684188487, 19.430083806150495, 23.343778099959078, 27.720998532854427, 30.55930260726698, 33.52492921252384, 36.87393384499059, 39.59318391117959, 42.847881951446986, 45.26768749010279, 47.61040802311633, 51.195466040355214, 53.07370670845455, 53.99629867336551, 56.09223030764604, 58.701581398714765, 60.52973683145537, 61.87076767065454, 63.01366964259543, 63.8408854063613, 63.95606988011532, 67.17730202508768, 68.49808175425596, 70.12737026649305, 69.70699300540856, 71.89474781693407, 71.32868410014058, 72.69513200459755, 74.33582714933931, 74.86240306705697, 75.17685267495611, 75.67546027721085, 76.0852963216456, 76.60963414756829, 76.55399257728287, 78.5577318218785, 78.79357364028186, 78.92156956339983, 79.39246609997893, 79.75404153378955, 80.07440791235848, 80.4893075162799, 80.35924430754957, 81.37153404962646, 81.86480832967234, 81.81014875083163, 82.1676607091503, 8.537736462515943e-07, 3.7510084288401777, 7.74430138848231, 11.666756321761419, 15.142050158314154, 18.439489320854157, 22.19049856251423, 26.420030532580398, 29.044473403539904, 31.953200604529638, 34.518635455284155, 38.99836469870761, 41.4423800393987, 44.43810567748803, 47.019800142388235, 50.60795852523478, 49.74358663374238, 52.24623457849031, 54.813407901895594, 57.770873354568586, 57.853893190887945, 60.63292201006304, 61.43833577905622, 62.37355822655547, 65.29728831547703, 65.61879040800491, 66.84921906053296, 67.09788065480474, 68.6124363579053, 69.49363394266643, 70.95582285748542, 70.82697493139094, 72.75993768818603, 73.12286347626919, 74.23071160251754, 74.42760033336252, 75.10551020476841, 75.29577472905642, 76.54882334138186, 77.42532117462845, 77.51827829525406, 78.23931734814634, 78.23129896716972, 78.97165039315107, 79.4147985944333, 79.27170473365278, 79.70976258523328, 80.70746148016933, 80.80554537366184, 80.61452645064917, 81.35697158037823, 1.2074182697257333e-06, 3.5820386717256114, 7.237608366229641, 10.870611285753665, 14.799809248617962, 18.039704885286355, 21.3578616652447, 24.18614604916684, 27.551032831026703, 30.509679302325804, 33.713904223126654, 36.9326206759145, 39.254037132519585, 41.259433120415785, 44.21531326097544, 45.96781104419856, 49.18609349874373, 51.40472475658834, 53.64882966796215, 54.387847646964595, 56.75016659119411, 58.70579420095732, 59.67433512482303, 61.27083509659929, 63.65916964462168, 63.97142837585036, 66.3538289427033, 67.34175921745931, 68.18067629601514, 69.34058979440148, 70.14440036595944, 71.36119928682375, 71.15392560930594, 72.26187812562667, 72.69949494448838, 73.16691153133849, 74.26231928278071, 74.78049944396196, 75.19125126994003, 75.04024406481031, 75.78130340572703, 77.18292947720869, 77.09770098265547, 77.38128355436298, 77.7636731500201, 79.1783417298708, 79.67530526367287, 80.3356048448622, 79.93548420465773, 79.92037828854548, 80.5299799491041, 0.0, 3.5359397872617104, 7.192678079815675, 10.935961263458006, 13.76544184134514, 17.99694552287126, 19.85505206218603, 23.32719421258144, 26.282194233469117, 30.436761048377857, 32.832721510688074, 35.60386677684718, 37.85413293254272, 40.94234504517419, 42.56670098367285, 45.22484271302766, 48.22841354018062, 49.97742415869784, 53.16499059442958, 53.24043563921357, 54.940771028339604, 57.170923333707115, 59.09497307486681, 60.132702215921995, 61.16628397980143, 62.49750251076836, 63.409651284223536, 65.23274944741264, 66.64729486737201, 67.23142164717545, 68.73872232506987, 68.85579657536884, 69.10103704758085, 71.61884595667932, 72.3994912651886, 72.05908051618859, 73.50161363422545, 74.91022783350897, 74.38168105597366, 75.16496295589057, 75.4779818874036, 76.1685214397021, 76.67554929814374, 77.00966391374162, 77.25664171053502, 78.56319804274806, 77.85226469208871, 78.66239513365525, 79.54511054680012, 80.05989864309139, 80.15119709423327, 0.0, 3.352141185392114, 6.65669802850561, 10.712061878204484, 13.151160126932343, 16.347183568313262, 20.12298168363913, 22.00213015965714, 24.384010775563556, 29.012968798802426, 31.775298676347482, 34.48167492476455, 37.884023605738406, 39.05711317659046, 42.30457437139627, 43.09345086454654, 46.214846674000476, 47.654248030956644, 51.050369729389374, 52.5616207392738, 54.70842436631465, 54.98044986110396, 56.97161226264132, 58.34465893003043, 60.50632283738458, 61.56079359428531, 61.933355786621476, 63.090093437167376, 64.78217054454738, 66.1259267366149, 66.8454515988071, 68.04629137324588, 69.1714008760141, 70.24191420929199, 70.26329845938166, 71.74986760400346, 71.97237630464335, 72.62850908086322, 73.49673026531583, 74.01593349746626, 74.15363094991358, 75.02803030762689, 75.50555572788583, 76.58920707869623, 76.78346952144743, 77.08510739794865, 76.99086338780339, 78.01100551318127, 77.29384961096922, 79.0694263879699, 78.96130894001676, 0.0, 3.1367982774573897, 6.553030937829404, 9.482700749957708, 12.843351717959857, 15.345209291086695, 18.706738393910104, 21.675464975809714, 25.30807636365767, 27.137835827697412, 30.652122230161087, 32.78034479411671, 35.02021963089918, 37.431242263272395, 40.80133751368014, 42.69313208007638, 44.20080269762696, 45.85512446343017, 48.16036053039532, 50.61492009218317, 53.229267331612576, 54.141213648328055, 55.560708318769514, 57.226923179559535, 58.243993107884805, 61.10549642416013, 60.59968123188639, 63.18613321679369, 63.08426620404834, 64.76651837149913, 66.05156705934314, 65.5974128173896, 66.9108806914508, 67.92586161017921, 69.24035884615557, 71.01090004152297, 70.97962748565574, 71.28574319513548, 72.29018365479324, 72.66632688189226, 74.17701369872832, 74.99069453109107, 74.37225420288131, 75.5429313679395, 76.02139488835205, 76.24238783382468, 77.45842608667766, 77.5864982977061, 77.59627943514171, 77.86654993946618, 78.77044300262216, 1.4787793334710977e-06, 3.0957575195600127, 6.093060505673083, 9.505395586294332, 12.19801824617072, 15.103943463026761, 18.021399309815752, 21.008069419681025, 23.643610103290694, 27.121310918287815, 29.67396965735279, 30.380917772741903, 35.44771028116322, 37.07533889672095, 39.316257253174264, 41.65827465966022, 43.5874729390158, 44.94761302309674, 47.308893124298365, 49.14372308217706, 51.40427702731276, 53.67205411220696, 54.79988214992803, 55.67684005106393, 56.27796741416759, 58.623036191131675, 60.29242286359307, 61.15182909252938, 61.82301797122795, 63.71281980058423, 64.37432366682395, 64.80826129589138, 67.14561332182959, 67.64830843525306, 68.22129463870063, 68.77472398416616, 70.32741746295879, 70.17857647027542, 70.63121938421824, 71.5591906890561, 71.97296678415067, 73.13219759965332, 74.3891658330323, 74.57823897090907, 74.64383173809607, 75.30202092602846, 76.53560102874584, 76.82779238952706, 76.72684731574853, 77.54047430860108, 78.0578223799606, 0.0, 2.938448284024429, 5.868973036674885, 8.892717281752613, 11.589211039338355, 14.750763127519228, 17.405375674354225, 20.707906800144833, 22.51983347323246, 25.539021410848797, 28.777761374814364, 30.53135737153061, 32.965925877558824, 36.183550531030924, 38.677136920708406, 39.7779976637207, 42.44348766294317, 44.76557389877852, 45.03287641018273, 48.1802235049654, 49.278649701668506, 50.73044520045593, 54.22226256625804, 54.94976891936343, 55.10453126041256, 57.26491000153987, 59.40442816547368, 59.34946971263477, 60.414554690355494, 62.87246827654484, 62.586559288735096, 64.55144438523844, 64.31268169549182, 65.2963608822452, 67.05034413736341, 68.39453215558137, 69.27028463239797, 69.06611433747815, 70.44118812933998, 71.66892186192096, 72.39302655554242, 73.12469340531773, 73.05055176381829, 73.5165487703888, 74.12421210027956, 73.86940129978578, 75.95060306521243, 76.27402716737264, 76.05113373122732, 76.33529585483608, 77.6576515053254, 0.0, 2.8687803544753887, 5.763284701104428, 8.35606495619357, 11.633974385867571, 14.144243760465551, 16.370788018026957, 19.736455372320904, 22.641947493206874, 24.679451472379593, 27.699406228441134, 30.070059176323614, 32.41530400348708, 33.687382237525256, 37.66564644701691, 39.98103272743905, 40.09514821854206, 42.18926433371764, 45.415935048820074, 47.25972365009851, 49.66005349548545, 50.16913574874007, 51.81169976610849, 53.41266287850946, 54.631934582931315, 55.40459119263485, 57.96184354694766, 59.03644829323468, 60.98386187485864, 61.184664444386925, 61.930938046833454, 63.58786081398955, 64.0196052203399, 64.72952022929124, 66.82342665406784, 66.89567294810018, 68.06132795939091, 68.59866436228491, 70.58451387512294, 69.73352067418024, 71.1224274565431, 71.83409860010312, 71.99525435975303, 72.32115051608035, 73.07125313784381, 73.33892531773014, 74.9554604738583, 76.13042257732316, 75.78124536044243, 76.18807093413876, 74.43612906436269, 1.2074182697257333e-06, 2.7672001239133546, 5.64105190797585, 8.278802255446367, 10.985700874146968, 13.906195421783675, 16.49585296362698, 19.12013815113138, 21.465984366734755, 24.22394794668235, 26.52624543902588, 29.806703678059705, 31.55453180440037, 33.61483504641083, 36.70723818538189, 39.39877727959102, 39.53258063070473, 41.45680110276617, 43.19736551314795, 45.083826270185035, 47.441439934442165, 48.227588178575125, 51.13856014235903, 52.04743249168212, 54.85594746186029, 54.42142803597825, 56.87526336926564, 57.664568159917906, 58.83696707161616, 59.99618037264869, 61.09218045382014, 61.986746321855776, 61.37442566796138, 64.11138579665467, 64.90757554257829, 66.1743177046678, 66.99038354157234, 68.6920280041333, 68.72106900222471, 69.14880142547601, 70.61712746123386, 69.68056354854305, 71.44834702245194, 71.93651297474842, 73.42443790401495, 72.13925501152009, 73.34730561628514, 73.21911612290519, 74.52979449110657, 74.64543552279989, 74.87130692522985, 0.0, 2.7392976977406636, 5.304674270440396, 7.75431082876621, 10.71260563319442, 13.32811470403209, 15.867391482848229, 18.526459537737537, 20.849857352363724, 23.700073397614606, 25.938403948357607, 28.1023957963378, 30.911605557791923, 32.87171511241421, 35.4232765877408, 36.64792800821883, 38.70814249561276, 40.958151396910765, 42.86686362962216, 44.87197743542152, 45.58609717592202, 47.28879170625615, 49.887229844555556, 50.97823002684065, 52.59159499982932, 55.11611368740224, 54.597553840423465, 55.54040997386898, 57.90888355704871, 58.70556791914983, 60.33229805054079, 61.8414093786116, 61.92553432431886, 63.72086187972967, 64.55135958013507, 65.18713806338513, 67.82015513384205, 66.19601622771563, 67.32087585854815, 67.53522231014084, 69.28733008803111, 68.88900970270524, 70.3083568464639, 69.73479143280557, 71.85100459456753, 71.91994939861793, 72.8431892093788, 73.21239323305417, 73.25729600461754, 74.56266898987167, 74.16656582182266, 8.537736462515943e-07, 2.688780419913258, 5.212484647440787, 7.55095083006035, 10.831974844620884, 12.825545350761516, 15.024955183769952, 18.030302598695275, 20.410028601009387, 22.59651878048374, 26.047118926723492, 28.607990054876556, 29.996566690337612, 32.332262635079466, 32.90352420959469, 36.509198674722704, 37.65080558486265, 38.83188879037674, 42.00389229425031, 43.10044604489902, 45.9242699381261, 46.79893413192712, 48.1167982867582, 49.575442177393334, 50.477395970428546, 53.18296086951775, 54.758411991748424, 54.8667859219481, 56.794213621251586, 57.249940571075165, 59.13247980546441, 62.000273982985945, 61.213417926546455, 63.25544397112804, 62.45353719131325, 64.23614137152288, 65.65759940605906, 66.03125378095346, 67.32870393232561, 66.32478122470647, 67.96689964035325, 68.65828603557381, 68.78591383930748, 70.00938657401151, 70.86908672585034, 72.29168115809456, 70.89694516273273, 72.53220436469074, 73.13769099359503, 72.87954484417246, 73.72157503784504, 0.0, 2.55636368930616, 5.039429475585068, 7.87347217349521, 9.763036242978261, 12.320586462848704, 14.697152623205893, 17.557519399683407, 19.660241763480585, 22.402582033811864, 23.87074495017252, 25.843353433711837, 28.568724989108862, 30.47666690852367, 33.90742125602189, 35.216389733569805, 36.91502512587797, 38.709433996125526, 41.183578330413624, 42.47200223348044, 43.79284930370412, 46.21184780731299, 47.256569539804865, 49.049141665052026, 49.90676293733349, 51.22948443747827, 52.559207814605905, 55.152424096559734, 55.56260264491474, 56.90006309379338, 57.23989118027596, 59.15611029076971, 59.78559303552101, 61.907735768488436, 61.754747152200856, 63.53807093123625, 64.41883789077424, 64.19341779762924, 64.98576175621436, 66.5399798359144, 66.91270166414695, 67.64019720478903, 67.92449786587643, 69.06239034200884, 70.29222360614982, 69.35279233580034, 71.74581807021049, 70.25804057902981, 72.42159047266583, 72.35553929336861, 72.51471466093001, 8.537736462515943e-07, 2.478221592975506, 4.884405269968456, 7.257008550709087, 9.880114268527034, 12.56229645572054, 14.387855061400472, 17.083047310713003, 18.676529564721584, 21.166227326025542, 23.680392557947194, 25.847804878225922, 28.673640036372106, 30.772633546968432, 32.28497178766207, 33.90266129469284, 36.00367362731115, 38.07183394680575, 39.58567819919341, 41.39756517440064, 43.284019438117646, 45.748540149458236, 47.236221930761964, 47.18654597120741, 48.71050218862885, 51.0407802075591, 51.28203973341882, 52.7014649468675, 56.14676442022263, 55.62109364181656, 57.31484613657666, 57.28814550599849, 59.33802490901565, 58.97221479417965, 60.8590016551467, 62.94783728177833, 62.582076790863674, 63.07883112888627, 65.08331695528302, 65.35524394114161, 66.43628209077755, 66.38920052058468, 67.86036845091726, 67.70552053779497, 69.04567215653034, 69.24424397177062, 70.23970957626825, 70.38001079451026, 71.51636862728812, 71.71183095696888, 71.07184722955604, 0.0, 2.4079078121715503, 4.8785709494431355, 7.120253364234552, 9.457421957857145, 11.586860823552339, 14.209698109810299, 16.17291218674184, 17.953221948092285, 21.347222119117067, 23.40526939046795, 25.287910132262883, 25.968705355095285, 29.383189166456066, 31.086167107417406, 32.76475708476576, 35.163810412197726, 37.32179509330604, 37.77362660372302, 39.66661625334494, 41.895967623321496, 42.84084435039405, 44.136625377255676, 46.37765438142515, 49.179914764282046, 50.03324284518065, 51.30479052748594, 52.53871789848495, 52.54989699913969, 55.07484758390153, 55.4441406752725, 57.66381921321787, 57.09469934414347, 57.97785488584016, 59.94381180655075, 60.459035232676634, 62.1710074648125, 62.67825484033293, 64.19753426617429, 64.22706479057555, 64.84233023838705, 66.99140696129693, 66.42636258181572, 67.04740598465511, 67.6420625607315, 68.09516247394752, 69.2568071453553, 69.92377836763475, 70.10675192183282, 71.25787529061131, 70.61965936314073, 1.4787793334710977e-06, 2.4070033894877922, 4.721464597728835, 6.934565831515414, 8.737191667971457, 11.505062215668195, 13.582499365249125, 15.414642899347092, 17.899003287265124, 21.02415596694136, 22.290597773553515, 24.421053847982552, 27.39624496966307, 29.138995123076356, 29.495240297276275, 32.55319369009029, 34.21906862502383, 35.14148551171658, 38.3016827498707, 39.504266413162554, 40.676302784930016, 42.19128500138924, 43.102380152552115, 45.717591340868466, 46.38383366749151, 49.37212489224868, 50.48552206925708, 51.0112171684017, 51.77928109060817, 53.203006838971596, 55.566270638433124, 56.941754751184185, 57.12055795742585, 57.64357077467531, 59.86218858721495, 59.4729898370978, 59.986477898705566, 61.33134333389755, 63.46667593327756, 64.1951260126922, 64.85271571965966, 65.11687556559941, 66.13021619336942, 67.66315960589894, 67.79595431060442, 67.33433227737689, 68.52943090777534, 69.47146314516743, 69.44376666068624, 69.37149484702444, 70.92546954371078, 0.0, 2.295103884156387, 4.36315597831748, 6.699648721319535, 9.137676432717472, 11.119757593288611, 13.488767840998978, 15.85022429110235, 17.67852337906532, 19.83797322954668, 22.12173666077667, 24.090699056793675, 25.984647833030454, 28.020849077749578, 30.27479221696533, 31.41368852842627, 33.68624679421656, 34.4937485065365, 37.277894662351834, 39.159541457425426, 40.29165935295752, 42.26399956293319, 44.46258812978693, 44.2492489130214, 46.02529325098095, 46.411889405531554, 47.792225307037626, 51.12011444449371, 52.063159143520686, 52.17244060189382, 53.44573988567107, 55.4247502673653, 56.232497767906764, 56.184447673938124, 58.062882769497044, 58.856456003845544, 60.8514649210493, 59.76673753864432, 62.27034180588171, 62.7907065856213, 62.717058638672924, 64.88731206702022, 64.88148888500365, 64.773074227234, 66.61189334855995, 66.77452004090354, 68.22023811813882, 67.4196323031164, 69.15778182680185, 69.26009876626924, 69.93285463199307, 1.2074182697257333e-06, 2.23719622360511, 4.4677782957711, 6.543089494997494, 9.068316364616345, 11.130513152897171, 13.158830649490556, 15.33792086079152, 17.043656829026265, 19.10735833268729, 21.220548926850963, 23.306559595770157, 25.38196048854182, 27.249562808037584, 29.42589719807338, 31.02328159104011, 32.20477255351802, 34.018624413652496, 37.18348232694001, 37.75238849326795, 39.20791362302071, 41.1739094987182, 42.81213573480868, 43.007938931454134, 44.44446147585637, 46.36516540392508, 47.68404363778053, 48.50346725756755, 51.734602076340906, 52.19418504418875, 53.02337552299524, 53.99538392086861, 54.949766033681215, 55.91941040997795, 57.89811780919494, 57.48213651392495, 57.05897842081069, 60.48110845895481, 59.57636587028853, 61.29029096682007, 62.079328814021615, 63.53333239554946, 63.771902856296336, 64.7586081718806, 65.28172559390553, 65.86036837677185, 66.16592684503594, 66.39484814697548, 68.45735395415653, 69.28946224447779, 68.68265490976766, 1.2074182697257333e-06, 2.082658938876861, 4.238676113790409, 6.3862234366303365, 8.398092122437196, 10.092475131746195, 12.64838922597658, 14.531919826582207, 16.403089228180335, 18.53687911067371, 20.289589094008885, 22.64345228947581, 24.681517279520026, 26.695345472374484, 28.33278895238972, 30.002876823195553, 31.763613699734, 33.9010801046905, 35.83249754054286, 37.05902635355526, 38.533437732291844, 40.583287701061515, 40.76958398104509, 42.66792191193681, 45.03065872535739, 45.716546544673236, 45.821040546395125, 49.13283305326358, 50.322442890529544, 50.669769487738584, 52.018778591829374, 52.92565215920141, 54.49548832130578, 55.013771222557345, 57.771446525058735, 57.41516567183483, 57.78498737053146, 58.43159470030855, 59.99148047728923, 60.922102749633915, 61.89118745048191, 62.71310633272021, 62.178382315013536, 63.76698468689376, 64.64464759813129, 65.23564146391355, 67.34780941792052, 66.62131528932376, 66.96205689152494, 67.83273260374129, 69.09269541134522, 0.0, 2.122990656197042, 4.189212055045288, 6.272619761798998, 8.021683806463237, 10.197289288338196, 12.384012475105523, 14.141712648153113, 16.390045711572863, 17.657467925500722, 20.324935276883288, 21.736317141138883, 23.24506571194288, 26.173924159329577, 27.489121019376913, 29.009157042527303, 31.097174323788675, 32.12658203849155, 34.62183583684194, 37.17584734069355, 37.53037066484538, 39.607323449884774, 41.20039061193996, 41.16623203830511, 42.6809520081268, 43.915523947655174, 45.614596110874665, 46.91047773650233, 48.27173120016395, 48.70970792282327, 51.796568072096726, 52.385051230638254, 53.82165168161335, 54.338971410657486, 54.965085306568525, 56.6649911400208, 57.65234059047898, 57.81220309122184, 59.15758803477763, 60.30403497703617, 61.21885882068582, 61.212774844319, 62.44943598558651, 63.13542671173431, 64.25357653955983, 65.28591298680695, 65.22807545840982, 66.08191839624027, 67.22267372854584, 65.93116694133825, 67.71170700230412, 0.0, 2.0260135149431395, 4.042928082757612, 6.069137349671841, 8.098815946227042, 10.254269573419878, 11.936038787694118, 14.166437290276622, 15.980986067544512, 17.54104490002896, 19.73703560937172, 21.53609723717016, 22.478790231889956, 25.59080438979743, 27.37014710337033, 29.47259949595941, 30.055769139696018, 32.334254816040044, 33.85060356211714, 37.44294725446841, 36.17827150263312, 38.710927354427774, 39.46353136831441, 40.30821711889016, 42.17699531876087, 44.160995614119344, 46.04677337815354, 46.858243146843925, 47.41076316692963, 49.318605614106204, 49.60874931415914, 52.00795057534922, 52.11832614189112, 53.26944276093482, 54.23219453016864, 56.20912487474689, 56.911045171552324, 57.18826726936308, 58.96453394377571, 59.668870319191946, 59.33875481775091, 61.270077861850346, 61.40394696554379, 61.76984017560064, 62.81418012077807, 64.50267053574282, 64.23997012431488, 65.01746808449742, 66.51283018705175, 65.33056197831964, 67.47519247780981, 8.537736462515943e-07, 1.9896180193713637, 3.9339227741400347, 5.917198393631071, 7.807839785168724, 9.972723754711136, 11.878177769696817, 13.679964381139195, 15.213492788956874, 17.873647461738724, 19.00747784084551, 21.113833846943827, 22.598988145868063, 24.233977476705725, 26.40599811552672, 27.634677663114044, 29.766983567531778, 31.230739338942758, 32.66874681058287, 34.349305548107175, 37.036911767943664, 38.499326458125466, 38.36828152022278, 40.89003032827385, 41.41183016358799, 43.335103257737615, 44.787513289884274, 45.800064787827644, 46.586468333033075, 47.698404520772456, 50.03667263555566, 50.25712037602865, 51.54549026634416, 52.08952444577244, 52.95316100214439, 54.197991677004424, 54.369237446325386, 55.644353915208086, 56.72196331170013, 59.33224865357615, 58.27450068052846, 59.83930097207049, 60.9642789202341, 60.48599119105079, 62.9538801359309, 63.601997194575574, 63.07616699294235, 65.00894510093114, 64.26558599356856, 64.36869118719405, 66.23637483501733, 1.4787793334710977e-06, 1.8611579903552302, 3.9395161241101038, 5.869959380891393, 7.798064198300398, 9.795423740817277, 11.431067697368006, 12.749274588956183, 14.907211043252913, 16.60315732071139, 18.131687505690035, 20.473751418770306, 22.47968475222695, 24.366132688013096, 25.925142298319734, 27.772418174399483, 29.85509796524882, 31.784839193395182, 31.791065006853383, 34.14675407179693, 34.499113402726984, 36.637475009540935, 40.3325545539961, 40.304721451906794, 41.45877148865851, 42.685254412315984, 42.75916322758899, 44.82520223472934, 46.354477970583325, 46.72983082214226, 48.78248599553106, 48.53395370730577, 50.28370130896506, 52.19431518539237, 52.09503475819579, 52.71944655864615, 54.8121954511111, 55.39958992498596, 56.596738533557925, 57.87876296361638, 59.544510839987694, 58.10590774457438, 61.04161370322825, 60.59090791343737, 61.35704727247304, 62.94615125740394, 62.21367708026179, 63.55048134139933, 65.13167948832198, 65.39619993118455, 65.53059985049327, 8.537736462515943e-07, 1.8927267639332717, 3.7430370988029833, 5.606581729607483, 7.564273720680586, 9.321479439815963, 11.054569136557726, 13.453899054498242, 14.694052617025669, 16.747035797405847, 18.570324861477093, 20.240876927283484, 21.700753288116054, 23.962033766166766, 25.108330776997974, 26.98889294897688, 28.95828276479456, 30.022838813284082, 32.07796317994908, 33.27232221956484, 35.816059411911745, 36.37603224071707, 37.986843901122405, 39.01295304529405, 40.55496428635168, 42.21048756315804, 43.34782056728399, 44.62864906657484, 45.17469760051541, 46.344128863020835, 48.43482616648553, 48.66212957241216, 49.39454972426305, 50.17003406328907, 51.13258727455506, 53.19957329600155, 53.95926287568198, 55.30508022518983, 56.722099901156696, 55.285533163725034, 57.72085275799817, 58.364207003163706, 59.773006365188884, 60.3430100372011, 60.12707677443714, 61.49781542439973, 62.44382763382016, 62.927731575379894, 63.79503336779183, 64.2902663477518, 64.17516845582712, 1.4787793334710977e-06, 1.7845656230337819, 3.7631395612094005, 5.569222558421282, 7.367488777633029, 9.068201387421299, 10.96497501792595, 12.74624871496326, 14.773854445685181, 16.44522178485533, 17.465896808487905, 19.741063452404127, 20.935026620781304, 22.422094718338776, 24.16970326313309, 26.20299478906764, 28.816173663328296, 29.33173057598223, 30.974379023005742, 33.133619715925725, 34.31508955432632, 35.93730710444488, 36.33865833020476, 37.962299438195934, 39.76098587395819, 39.956067946162456, 41.969283094557596, 43.339031691457585, 44.86937031970988, 45.55057658073969, 47.27221747006555, 47.719461086958056, 49.31590573103825, 50.08635148215826, 51.75888916663205, 51.73459176563091, 53.53428299366125, 54.305510397228566, 54.58559127721271, 56.24452095625446, 57.02828113928104, 58.18592142910246, 59.3086452451081, 59.42787217479594, 59.644325370113926, 59.5410587229838, 61.802512600902816, 61.82890930560296, 62.788033045626605, 63.01229317762958, 63.61288969417724, 0.0, 1.778030817706405, 3.557078103931229, 5.493670429444034, 7.2181594348618265, 8.92511768918849, 10.858239261847656, 12.263967584831814, 13.678949293481343, 15.947691737259543, 18.210888407333254, 19.9611689070371, 20.189822226213412, 22.84058337873518, 24.97626569564425, 26.14702587181501, 27.706078380271723, 29.62348389026284, 30.27640131865883, 31.94301593777254, 33.65923943780893, 34.144901520837614, 36.650611523646646, 37.687014565425805, 39.60658996509673, 40.71480662808808, 40.993183965604295, 41.96498659549644, 42.595168643284325, 45.15609834775433, 45.45568581962554, 46.43663264357923, 49.026916360847665, 49.65956891531293, 51.17472879918919, 51.30097448078622, 51.82179002342014, 53.38616389245531, 53.97736266568446, 55.029270636572086, 56.453245320508806, 56.02780302670135, 58.41011503557463, 57.51329186799375, 58.5395524226576, 58.7361782390228, 60.310874158151584, 62.29223498415353, 62.77081757577923, 62.021193392079525, 62.40611919992497, 0.0, 1.7751743352376446, 3.5775270600699898, 5.231172070561099, 6.731258640082119, 8.801834719376412, 10.189816992729343, 12.191510965391112, 14.13596160005957, 15.761403971064524, 16.559021853287437, 18.49652566137214, 20.06319335087444, 22.210885761964917, 22.938519310497213, 25.606450859675284, 26.617365749830835, 29.2109446978788, 29.35051044859762, 31.586865200457176, 32.822396840064854, 34.2920735816898, 34.4667942888346, 35.81216464842105, 38.68595276581788, 39.8913586081177, 41.276860118596474, 42.124834395950266, 42.041210452630295, 43.69729570359412, 45.40328987456305, 46.67147672687162, 47.79997114060977, 48.28853067518838, 48.57130922741662, 49.71641634663218, 52.642439283341496, 51.88959092576228, 52.961850220593576, 53.79743748043842, 55.39148609387638, 55.334333762707736, 57.78121857744385, 58.2686630349678, 57.88396434605285, 59.39656213740466, 59.59996220667013, 61.383357416560735, 61.364610030966034, 62.141376607810976, 62.82072077823722, 0.0, 1.6797593742405394, 3.454202034714636, 5.073291243373066, 6.6806450578318515, 8.187307933059255, 10.339746067305361, 11.657105998652888, 13.814729642460303, 15.550741828145116, 17.324183825097208, 18.351388875668007, 19.630185172136706, 21.93272221115604, 23.029548853308057, 24.723536981063038, 26.04679003682094, 28.139129393750643, 29.01464403371224, 31.359495410152263, 31.18447240170723, 33.750632042597005, 34.18413038318151, 35.95887546584873, 38.49126500563652, 39.47049922010013, 40.35023153235263, 41.54932181575566, 42.051693222834544, 44.06051408732268, 45.122803005995515, 45.89569942466313, 47.220664152530674, 48.98512400890018, 48.37001441506792, 50.03955519816676, 49.61422361002573, 51.77991284299366, 51.829441511381695, 54.31139512689093, 55.88365231489539, 53.520658064956926, 56.49303352418475, 56.826238971514606, 57.25975783374346, 58.079430365044715, 58.5391138594989, 59.71255579351382, 60.30972217115785, 63.08047197886163, 61.28748139563449, 1.2074182697257333e-06, 1.6125386648894724, 3.2682349646208624, 5.03380609059423, 6.575074120265676, 8.539430994441481, 9.8514954420335, 11.90426545180474, 13.187217003228668, 15.002900281188223, 16.239903185007464, 17.90581651399637, 20.01885086438022, 22.14022390059531, 22.64390101121254, 23.657290076658093, 26.153717466173614, 27.218524775105482, 28.076257233367954, 30.3952505032227, 31.19301062717807, 33.6123844557541, 35.40487609725049, 35.61366491098941, 36.367871770982454, 38.19377174480817, 40.41012378906532, 41.228192468419415, 42.01276556478974, 42.61426915129188, 44.63575286415007, 45.3859441756791, 47.317858588801066, 48.07689603172414, 48.525121635541204, 49.104738100261045, 50.78802167470556, 52.220582956020166, 51.96493605024094, 52.36722571654285, 53.8637791632899, 55.73695409190429, 55.6005676248814, 56.18098706039813, 57.84051786365023, 57.298906530668006, 59.13037482246977, 59.8546231148795, 60.081397785224404, 60.806231712431824, 61.713716903805235, 8.537736462515943e-07, 1.6138358182451125, 3.292616498572647, 4.811335429124876, 6.648715201988041, 8.289302817814828, 9.652430412625385, 11.454307454451351, 12.5910240452192, 14.62195011341346, 16.494584627521185, 17.88032373682564, 19.002924904648413, 20.81183241748527, 22.13769880145293, 24.345283625957794, 24.693746600451345, 26.83561685800264, 28.223731624520674, 30.005786661072644, 31.131352670990587, 33.47520892562285, 33.75956292188946, 36.124377803468285, 36.20113858534117, 37.97551572895172, 38.705289563495306, 39.15225773757164, 41.02255928614352, 42.43282015443686, 43.53861556636789, 44.66458106559337, 46.199501051231366, 46.41778524828759, 47.34898298056742, 49.208210339868444, 49.909520866535175, 51.1798800058914, 50.026053522027226, 52.22279435913168, 52.498793391219856, 54.06066452916366, 54.28039445171043, 56.57212742152836, 56.61109794062111, 56.09292366907861, 57.72464551905355, 58.67292178764548, 60.04718332766404, 60.79647488348628, 60.545145979333086, 8.537736462515943e-07, 1.6792319183381252, 3.1349501278958805, 4.8064407073238975, 6.3912160182769, 7.980741466492262, 9.81357313994884, 11.204324375052165, 12.689539885005258, 14.631088702984323, 15.97945513632012, 17.595301408335878, 18.778014416553262, 20.373378087151888, 21.07449398060341, 22.741374346375007, 25.32260022094633, 26.42174466508749, 27.02759483431246, 29.45462508769131, 30.089595456386455, 32.00418001619645, 33.685651522129504, 34.712102466384394, 35.09341770433214, 36.82015826633536, 38.093056859080306, 38.304741312531405, 39.704243500856585, 41.49973865056153, 42.167575710498625, 43.318411842565496, 44.60629963012154, 45.31496712285119, 46.25759961929702, 48.43723082847869, 48.681216244217275, 50.61948257417226, 50.50158209897646, 51.29061296106138, 52.03524341007414, 52.68627348812848, 53.83358447414662, 55.362655022694334, 54.959173037219976, 56.089375840513384, 56.91870775956623, 57.34974177061466, 59.40942822502558, 59.00028882121595, 61.168669660130774]
mus = [0.0, 0.0, 0.0, 0.0, 0.0, 0.0, 0.0, 0.0, 0.0, 0.0, 0.0, 0.0, 0.0, 0.0, 0.0, 0.0, 0.0, 0.0, 0.0, 0.0, 0.0, 0.0, 0.0, 0.0, 0.0, 0.0, 0.0, 0.0, 0.0, 0.0, 0.0, 0.0, 0.0, 0.0, 0.0, 0.0, 0.0, 0.0, 0.0, 0.0, 0.0, 0.0, 0.0, 0.0, 0.0, 0.0, 0.0, 0.0, 0.0, 0.0, 0.0, 3.6111523007491386, 3.5762377160585848, 3.6344922838034925, 3.6124426710861415, 3.7523542871146227, 3.650469578357022, 3.6415039043338155, 3.718979734507338, 3.585133177924612, 3.5917445986903784, 3.5347867153333095, 3.702079390290174, 3.6233772495327243, 3.6361029829227696, 3.6899310289561167, 3.6662084428041175, 3.6365979812956333, 3.7098804350412893, 3.549980824709736, 3.6346652290239723, 3.58171149064629, 3.654810608563257, 3.690911706133474, 3.619238258721897, 3.7199108837698596, 3.659095070744298, 3.588986998754645, 3.6580046786957374, 3.7290808977815217, 3.7027930671893383, 3.605706658881269, 3.5878611322574856, 3.621924847699682, 3.5947790804219464, 3.64615291156292, 3.627025229237447, 3.6133353528200516, 3.668779224525333, 3.7198818022222206, 3.6879812067802056, 3.586817987322384, 3.7336711545786283, 3.6302421114837102, 3.6497104687179855, 3.726817261141752, 3.667698608451891, 3.7225332637473687, 3.7859473202989538, 3.6338689023118174, 3.676412889476647, 3.650318688709494, 7.281164742438903, 7.422010257253097, 7.3313090850872715, 7.593352908293455, 7.229040233481945, 7.397012839384585, 7.456487140569004, 7.253169433609861, 7.400477753458811, 7.441093286103859, 7.382981240406418, 7.151949627088742, 7.192979378596255, 7.171780678455354, 7.332748777767639, 7.326662218920484, 7.2589306413024675, 7.163205091140558, 7.208126749833122, 7.2907094553574145, 7.302169363317476, 7.20569134662597, 7.352791024513345, 7.306470603319295, 7.222056619599149, 7.265707445751392, 7.475117745777785, 7.355282606678011, 7.269021815913556, 7.315217061183534, 7.354364280595213, 7.204779523793426, 7.3717172193806375, 7.19173489670234, 7.439017895381981, 7.367853082408277, 7.32785895902563, 7.339722483708606, 7.384925129179409, 7.273623859235899, 7.426418089289293, 7.173470170120098, 7.375824814100949, 7.409272674079212, 7.255842021664696, 7.218421140276048, 7.386885061302657, 7.4905599703994525, 7.166997498498269, 7.233607784218389, 7.259707168068922, 10.907660390256318, 10.98114910198612, 11.068756978097651, 11.093691556255088, 10.949333767791202, 11.35661008710477, 11.12032387438365, 11.045728264799129, 10.85421132692094, 10.927212827151672, 10.79964403536318, 11.233827303183814, 10.977345062068963, 10.978940836768079, 11.326124060684885, 11.12100383836822, 10.874059212397906, 10.960890650036792, 11.06599662738102, 10.716291712456963, 10.914594010070926, 10.94982020852898, 11.091339514392995, 10.765361176539466, 10.939570278339852, 10.74308491008772, 11.052467776157808, 10.887743904434704, 11.128712912617214, 11.296634154425934, 11.112603718135095, 10.96467002269577, 11.082138745143917, 10.904644016272004, 10.874584930686819, 11.021720522833135, 10.806225600412501, 11.169606246944086, 11.032974135211315, 10.700139841187575, 10.636223594770616, 11.056909758232509, 11.069270237992017, 10.940355094088465, 11.196214080263601, 10.443928831867531, 11.10400863084169, 10.763801797562977, 10.917727048505531, 11.13799941400659, 10.74775811141574, 14.598067089280248, 14.90288680458467, 14.945509461859487, 14.526395977451857, 14.407783396246773, 14.78490301246468, 14.208396022649215, 14.712284870602536, 14.551189883219442, 14.652282233797871, 14.251079520642838, 14.728448397581444, 14.59602903930521, 14.950508358744003, 14.50329062224547, 14.735902726178335, 14.441757571098861, 14.223302942505375, 14.574883090964075, 14.446046260534562, 14.654235176127184, 14.580258185585887, 14.28939167172376, 14.198919513243615, 14.71443964045984, 14.548959788055937, 14.708485905064142, 14.457424196958259, 14.943580665412608, 14.75376206721705, 14.804753094601494, 14.676969638098788, 14.353300394827778, 14.571252938777123, 14.78354665935191, 14.561903111334132, 14.852644137512106, 14.407978442049926, 14.099652266456136, 14.380885612542443, 14.408639637010708, 14.451515715817932, 14.660614878778013, 14.789891254355695, 14.549072382810312, 14.751048818809448, 14.557640324216484, 14.9829706465603, 14.192844284664368, 14.362942315642247, 14.49667924617085, 18.534325008531884, 17.913979986452738, 18.73790603801295, 18.31136583761624, 18.48003275323788, 17.88370455492385, 17.916621632925196, 18.298225486464812, 18.4783808358201, 18.20865899424638, 17.962638126691672, 18.11180675110908, 18.375536122085386, 18.44066966857288, 18.602594639561104, 18.66169319296956, 17.99086766850569, 18.286900798328837, 18.14419864821056, 18.289866667437487, 18.19766631232012, 18.047270473499427, 18.250884084654945, 18.51115737162429, 18.137647804734755, 17.638264664813736, 18.205982181184634, 18.270320884086075, 18.568503230137615, 18.231951613872113, 18.015765372756327, 18.883345871678078, 18.497056963500846, 18.393649158398937, 18.463291121294144, 18.256224672441746, 17.82814859994169, 18.666147889637926, 18.44920980872785, 18.26155248083667, 18.216472963192167, 18.39961396544519, 18.284086268354265, 18.16566086196515, 18.216594921909948, 18.072283390770615, 18.231534535830882, 18.04662138886017, 18.27971423689994, 18.101127028736173, 18.46646339527656, 21.717634279668566, 21.68594282721979, 21.18866690519617, 22.248103445301037, 22.504302163806106, 22.44500169811339, 22.170458419959107, 21.83988455618559, 21.772117003376554, 21.84250584997094, 22.560892041504236, 21.738872387686396, 21.848283409582447, 21.937840723581083, 22.211519459416472, 21.6412996110097, 22.273374969172604, 22.24436904533105, 21.899307206383416, 21.521381796862553, 21.580019473265704, 22.282115520787755, 21.505549431330518, 21.990067627412845, 21.79292972762627, 22.336169147771948, 21.587875552323723, 22.410900635628217, 22.088487563798004, 21.6262198278229, 21.903300914240653, 21.3709680109612, 21.920124706896836, 22.232744950141534, 22.01163015098177, 21.628749627387467, 21.594762205964898, 22.022278455519576, 22.114982420244793, 21.95081246101158, 22.57657355946657, 21.889280210771542, 21.85280074290082, 22.29923413046369, 22.118672744452674, 21.700618779924536, 21.846487156352854, 21.653930690585742, 21.81222620583164, 21.84855775498304, 21.824070607159758, 24.864262881990793, 25.78353874977377, 25.57022079868359, 26.082857323447787, 25.254956837594154, 25.51233862421463, 25.514953964615284, 25.48636194665256, 25.91112140460533, 25.623339757531387, 24.96697503487712, 25.152327582944412, 25.39921718456902, 25.613813150529925, 25.83645507368119, 25.350152338879706, 25.957596416251562, 26.2121445030475, 26.003830362582253, 25.865939840531013, 25.64817688966301, 25.463594645063036, 25.51520038151729, 25.576597572532272, 25.263565143919383, 25.171355311046966, 25.368529401503707, 25.27492002193045, 25.597361162649666, 25.02750818014631, 25.855001907520546, 24.75317564241345, 25.913367258113407, 25.307019162539696, 25.27385377209157, 25.7244318129752, 25.598770847185023, 25.021701361157817, 25.409575700955592, 25.827035515644596, 25.517115999942238, 25.991386751317215, 25.841996251931153, 25.746224744455464, 25.669587910155116, 25.882226385357793, 25.151806515148987, 25.738949033869304, 26.554086561722187, 25.409035833574467, 25.271763891212938, 28.881925768111, 29.08274621893874, 29.259379632012397, 29.42733649528453, 29.04397261655379, 29.195776123433948, 29.444805830952173, 29.12080315791923, 29.69588228041361, 29.44689344841055, 29.42997238995909, 28.704014649269737, 29.83554308145514, 28.87780241966346, 29.563428861639135, 30.04075281701311, 29.02075628052684, 29.20144049106331, 29.124387060321503, 28.78712737674688, 29.055750740512863, 29.488110059075805, 29.560522476913675, 29.06779820972412, 28.978989531666198, 29.0027511344972, 27.804909365954522, 29.746385567310192, 28.54858086639614, 28.98678355470223, 28.41555762872218, 29.47034648321877, 28.99415659238055, 28.991985719783237, 29.04614677829229, 29.84946172724283, 29.471170608717685, 29.357307845141424, 29.331281715219784, 29.425003364790314, 29.077182939023523, 28.431882342717387, 29.499198951892552, 29.378286688461174, 29.12014467256018, 29.198271674974997, 29.39131392484308, 29.6386284930211, 29.241875584773986, 28.27860356442192, 29.23027232696988, 33.33122913711465, 33.380916603228464, 32.51713047284327, 32.32484892772018, 32.428634850497204, 32.37486963113713, 32.594097500164615, 32.97367056473435, 32.09589830784092, 33.3038669762582, 31.64624762801538, 32.476672870030846, 32.478187661937184, 32.52664670580377, 33.66520972969337, 32.58574396718877, 33.61007890878104, 32.6643740081314, 32.968051176775155, 32.807890269909564, 33.28997305376403, 33.195697941890316, 33.33274888066415, 32.20641452981996, 32.83558343123032, 33.03241801048214, 33.09491343604462, 33.20643223299504, 33.371135845644815, 32.52956032374084, 33.01594832323343, 32.736439362803914, 33.037029784447164, 32.73994277350515, 32.52448656879424, 32.057215692318856, 33.014977887495455, 33.066393429700476, 32.860968977653215, 33.431237728410316, 33.027213097902916, 33.02166196942557, 32.6894227111019, 31.764960204570865, 32.60248228651684, 32.920541112081274, 32.818177058650214, 32.74610924754773, 32.36323128692154, 32.92716083942061, 33.289429022505374, 36.72333151665565, 36.36451674527269, 35.73978996434023, 35.93330823343943, 36.3041330805009, 36.435984191636486, 36.5671866047172, 37.1777537828202, 37.31805468029234, 37.09132728077271, 36.31019021536968, 36.58200174279186, 36.33296163357713, 36.22509685716535, 36.29362148387169, 36.643136764811636, 36.92357425682127, 36.72827525222247, 36.134343654567886, 36.715842435793114, 36.723384559543724, 36.397061155181376, 37.41172324709766, 37.01371840778809, 36.20428852285261, 36.67838907543224, 36.303388431824295, 36.0034906813164, 36.15075698550114, 36.47531986140291, 36.967909821534356, 37.1131721627288, 37.06374900487251, 37.190889158088204, 36.96754001284438, 36.37284085430794, 36.2276212659708, 36.05814383106157, 36.91816101570875, 37.08444287453378, 36.787447006236214, 35.932478018359234, 36.696596503405395, 35.73164747460804, 36.290404323343566, 36.03478198826428, 36.59942325543632, 36.194617810718185, 37.059401642342586, 36.64309088495749, 35.80234594955425, 39.90405792209839, 40.59375177063898, 40.6847993260579, 40.270851221305854, 40.2410499880001, 39.78161031193433, 40.372577534021666, 41.06201261663898, 38.75776245521901, 40.38262150762779, 40.373226533527976, 40.34348585470547, 40.351324199761564, 40.32966595263839, 40.65890928271685, 40.341248194744146, 40.961255157443915, 39.95329225545978, 39.229117951604735, 41.113333929605645, 40.0759672898027, 39.55402102886197, 40.85839276170129, 40.217803526602374, 40.30740058934742, 39.34131654055768, 39.85570310325972, 39.09245143343147, 39.99263485882813, 41.2984720939437, 39.58681159537349, 40.097841700296044, 39.68330514258874, 39.98071918969464, 40.24561570424579, 39.351399752380445, 40.190679510454224, 41.097449343037724, 40.32352683530869, 39.197219898767095, 39.42964917060835, 41.052184469206644, 40.6556677157973, 40.128741344778575, 39.21600813620382, 40.37521803832419, 40.15389145134778, 40.53135384864431, 40.05254880795616, 40.30922110791167, 39.74086704113278, 43.72541229778731, 43.502841860111445, 43.18279053087143, 42.96669117267044, 44.17043908516321, 44.133460397312035, 44.75802988946008, 42.6445901028791, 42.73247418648047, 43.44964687752946, 43.57956262941837, 45.24163388762763, 44.365292664697044, 44.64334846556139, 44.85525310521347, 43.63252983556603, 43.46641590736146, 43.89709570877698, 44.8256224373333, 44.174405143512985, 43.93491683224079, 43.36210989014594, 42.6615260458711, 44.06648901779699, 43.696861869398795, 44.76996594867424, 43.670857608704246, 43.59634667802664, 43.60502408345616, 44.05442224713527, 44.436164836609045, 44.55272308533187, 44.991021121360895, 44.26289562886397, 44.545713050236635, 44.7521624597445, 43.51343593553787, 44.33050563010008, 45.10298380849277, 44.26627710325179, 43.930414496998985, 44.371281718195526, 43.81342259999813, 44.475408238226905, 43.74862740348308, 44.54880710201938, 43.70394864302323, 43.7765750579457, 43.4969997391359, 43.12055702195269, 43.4333483557074, 47.028279054771474, 46.82092514272259, 48.581785196794506, 49.02255754568195, 47.04854180738162, 46.52481205603266, 48.70655190010542, 46.468423195481684, 45.7103884001775, 47.132901133131725, 47.490863530416334, 46.795842798245445, 47.68267966660554, 47.679625902084524, 46.9823865626994, 48.6779439764236, 46.810401471469355, 48.16580856671431, 47.471516726819026, 46.330743271883506, 47.54434973167222, 47.63016687296868, 47.37353322556112, 48.75715194891618, 46.881882839612715, 48.0452786213679, 48.385234369682955, 47.664936901681614, 46.92934613970002, 46.82331004072509, 47.598922218431966, 47.96949673628761, 47.30848364937336, 47.13761362766172, 47.583390143110904, 46.774122268363286, 47.57208010321211, 46.270672933589054, 46.684757932965184, 48.592171815626486, 47.39915057446671, 46.54600415827708, 47.126327182645454, 48.18983006324071, 48.553080355729854, 47.6825195719009, 47.690765630203735, 46.05308430559786, 47.67352433938954, 46.57323785030568, 46.39445077739424, 51.079533839534356, 52.72711994518432, 51.099326744615645, 50.033157945349345, 51.148308886437164, 51.10415620695608, 50.10886217405106, 50.841075252394255, 50.33636202966584, 52.17274765700192, 51.455918370145135, 53.14310676179434, 49.37583221506525, 51.7976496932481, 51.93388043910708, 52.57375021760516, 51.252546809917796, 51.54146662392378, 51.336810582608074, 50.52383005787177, 51.3190264190431, 51.84083158728888, 50.79702436077805, 51.619032683586006, 51.51339388563102, 50.829267205875176, 49.92049753966418, 50.21812839350034, 50.61525107562054, 50.78027146452152, 50.845269430500316, 52.11042541734787, 51.089377360486004, 51.27915559231711, 50.734607158360966, 51.38195117923495, 51.11840623032427, 50.670704742942455, 50.78126388717791, 50.98897320739913, 51.667088352943296, 51.191119454742335, 51.67319770301466, 52.36444088979677, 51.81587771650218, 51.01418736487969, 50.56109590865198, 51.42598356535669, 51.99358895517789, 50.602949342314865, 51.87989964448939, 54.16239116966115, 55.703706715490824, 56.40890882807151, 56.032894550820906, 54.433630176046435, 55.11731837942099, 54.452031161069485, 54.20272395087595, 55.58503867992997, 55.95679796471799, 55.17358431167704, 54.23364564790628, 55.269489822487415, 54.537179848419285, 54.01445669972338, 54.39385134158388, 54.68159257736264, 55.42035253676287, 56.1600103479774, 54.096896139856334, 56.01439160238648, 55.00173808781892, 55.11866183635615, 54.50952256902439, 54.00899879938792, 55.073195183944435, 54.70104771095579, 54.07039362646677, 55.310264002685145, 53.68252321011631, 55.294782544375536, 57.12818384342556, 55.40314056069985, 54.968873789593154, 56.316812907483765, 54.22684501297952, 54.57111111379481, 53.82275356409202, 55.68884716696315, 54.25984564132376, 54.55241649604014, 55.66802489012054, 55.030850198775234, 55.90966474530521, 54.14743779053735, 56.182279068167794, 53.84340373681015, 53.84235926929901, 54.771456997660735, 54.415610124579366, 55.14570397324282, 59.00566681392611, 57.39865630958426, 59.73898819967215, 59.11922143431128, 58.265687723349785, 59.12090280337915, 57.868685859580054, 58.488764751145695, 57.49160851432991, 58.34892547963219, 58.867686608280216, 57.92083932362581, 60.037036575592666, 59.076392637137744, 59.162987268965445, 58.23626634505129, 57.71698343023711, 58.44626790707906, 59.16512058946321, 59.39371887238748, 57.53435141014785, 58.604878529334606, 58.13381050617923, 59.18347631378869, 58.497589754647535, 60.22630385202213, 57.74422358588314, 58.98106963092919, 58.42505572362994, 58.534629869205496, 58.261237019740534, 57.172612319754, 58.25280039369646, 58.094463737582025, 56.86469091661353, 58.790290725434055, 58.904819961409515, 57.86148643681916, 58.43461799070232, 58.58950665369554, 58.30567182013301, 57.062324473129834, 57.94131492699407, 57.93874415861219, 58.50536676417235, 58.6040469558903, 58.13471404314882, 57.44679645355894, 58.19441081242852, 58.53870171570822, 58.71553717384981, 61.05138534411919, 62.60746306719697, 61.11280134900397, 62.65829430718336, 61.48477967220606, 62.07059635404954, 61.64401236044111, 60.87172387970772, 61.22729107680235, 61.546479500648225, 61.92574833428367, 62.86851916099312, 63.4127900508235, 62.87868069003352, 62.023412699037934, 62.17963299499533, 63.01353547141988, 62.463802609585414, 62.26642100134663, 62.74320782941356, 64.01413534855831, 61.59545361922207, 62.14309031882597, 61.048430662520516, 61.754757931563034, 62.44640591140777, 62.07821776969903, 62.911852607168306, 61.47363331928278, 62.79542404835768, 62.1062213570128, 62.27209963418782, 60.848642030315084, 60.973278079707754, 61.09351292575294, 63.41152413602544, 61.00859255815745, 61.33940014586902, 61.565008042868314, 64.35869358742563, 61.598624635329095, 62.47991607994137, 59.718301428210125, 61.25576920216873, 62.60730657863502, 62.56888109223491, 62.03713603270105, 61.55596537939409, 63.14798444072202, 61.963386123047606, 62.31564032763925, 65.81395489534405, 66.1614567985563, 67.05855072041531, 66.10749604434035, 65.07791605309977, 66.14342821716873, 65.01449685963853, 64.56748779221357, 66.96373401735539, 66.64244860713741, 65.95760891317603, 65.63803446523744, 64.43493306948302, 66.61803164555137, 66.31220517911886, 67.40566245251014, 65.97095251690527, 66.7383512750466, 65.7650506220867, 66.30977417706724, 67.74213549761721, 65.27411687389774, 65.8552236626177, 65.26572382935483, 63.821822127965184, 65.82009288205705, 68.10433311233939, 66.31900636456986, 67.06940946235085, 64.36033175353954, 66.54622655785305, 67.09696516710747, 65.75448499896802, 65.85277121859428, 65.70661221572682, 67.36429978281046, 67.45732845800292, 66.7798259448735, 64.98420461974847, 65.7422315062436, 65.32222877038352, 66.23092929839828, 66.58897437872385, 66.02474789156446, 66.12516886981801, 64.25026255126105, 66.99939987230671, 64.20962074521216, 65.4527604385516, 65.66960343274977, 66.8156650985024, 68.96328806329008, 69.69573313131198, 70.07118512620517, 69.71222423252263, 69.67697548280991, 69.226447293414, 69.33207623716093, 70.87715037001428, 68.81705996082219, 68.29480316235693, 68.19133531423377, 69.26425308841706, 68.44382978820977, 69.46284300425955, 69.69406553870263, 70.14872667568689, 68.62773031596105, 68.85748706922982, 69.1602452137729, 69.00568855087486, 70.44596492812326, 68.33973782828025, 69.77894361304791, 70.5548957964412, 70.11412532622249, 71.55124152176698, 68.73187929172079, 69.23399822767053, 67.69913701702833, 69.67725847312154, 70.51287808276028, 68.58837037938764, 68.66936288719423, 69.09593569016127, 69.48849847377906, 70.52816605075306, 68.98420334439128, 69.35113693526074, 67.85222345842168, 69.24373472073177, 68.20792748434434, 69.82247365239239, 69.49762632008171, 67.95466169831647, 68.88402912031971, 70.14654350537334, 68.33698537484209, 68.7334227181403, 67.51520083071777, 69.70391163537953, 70.90400246113354, 73.83923303450503, 71.97572291337057, 73.73754686629937, 73.59792404532777, 74.55260069317625, 73.34128887836744, 72.56970494550652, 72.10891611572298, 73.79422216337956, 73.46780119884897, 73.78074894569197, 73.87429222108337, 71.58445055430475, 73.56958127685076, 73.01425016192286, 71.98505340242698, 71.86236973729493, 73.4296460040387, 72.77474852588314, 73.43574952421892, 71.05798423348887, 73.68002667046602, 72.65070444859248, 73.38004589535458, 73.80446184076686, 71.56845848837578, 73.2605409682425, 71.32776875507915, 74.75014695663094, 71.3391118930445, 74.21790135569495, 73.78411441478126, 72.26582340208292, 71.54562718196205, 73.17395164823097, 72.05346625737793, 73.40891128241442, 73.6508045680269, 73.82449481759309, 70.90529729382494, 71.08545137267646, 72.69792125972909, 73.30408139218126, 72.96548023694048, 75.45509677364382, 74.48566269095292, 75.39632889402995, 72.29827958769373, 72.53159237521203, 73.63786866537245, 72.48247261256353, 78.13273200597698, 79.10652629800195, 75.83523146516991, 74.77198067481635, 75.24959661556699, 77.53802902911262, 77.77185003607423, 75.47711083553504, 77.14221043557023, 77.56466686616396, 77.81087845637249, 74.69140693283099, 75.95128796536, 76.21126821889206, 75.65719604675533, 74.93182820994814, 77.73979631166522, 77.60423638042337, 77.7347423827453, 74.35896792505328, 76.960125066898, 76.74241329865445, 77.35327739616551, 75.93143364595545, 76.65380913991108, 76.70875509590022, 77.19236513872951, 78.80847278095138, 76.08628681510493, 77.59027631632799, 76.98259446639496, 77.26762150414407, 75.40292814639953, 77.68786454838543, 76.23942510284283, 77.0775579999814, 77.05872463520458, 78.08053928130536, 76.65172280133424, 75.71376357897614, 76.92865067002202, 74.99806707882665, 77.95626872612135, 78.25006578049421, 76.87320678366592, 76.58406327264878, 78.3036099785231, 76.05709643217695, 76.49024539862579, 76.73777048799488, 78.96006869248649, 79.10251037244116, 82.16425502827532, 77.86893163929611, 80.98013216660699, 80.01285164016333, 79.92995093478925, 80.55407279551963, 81.0979595262793, 81.23969741810451, 80.29084446690983, 82.24506197403241, 80.79564391522446, 81.74989343779279, 81.81533451446586, 80.07445422609243, 81.33022413042401, 80.01900711376452, 80.63906550115799, 79.02373551272275, 79.63986946297369, 81.56198801754559, 79.64283963184462, 80.32959546139602, 80.36032031061528, 78.67957847674832, 79.22009914783439, 80.07551357937155, 78.75896691831795, 78.23080727969939, 79.24661450081162, 80.16347942609713, 79.46420405492887, 79.31239044523745, 80.43004240985614, 79.06757522151656, 80.80984454816507, 81.12034158643432, 81.25259840212827, 79.83926597650012, 82.98738449382454, 82.5482021390008, 80.31109534288703, 82.03755728262564, 83.47826225311093, 81.35946613603363, 80.02837558430406, 79.06145934806484, 78.38060569783124, 80.8751557286011, 80.5538226844565, 80.16002676108322, 82.84073770495836, 85.82694171197755, 85.31421688842438, 82.1347810404937, 84.75197003161098, 82.03104989997225, 85.97458077374476, 86.28336630056293, 84.86822019830359, 85.03770948281496, 85.57304642810585, 84.00213365207006, 83.20538789359449, 84.74403368239234, 84.10477305694985, 84.94972693111215, 82.48999910001356, 81.72037913756316, 82.72321866721875, 83.16974941905526, 83.13574216863259, 82.88441844096843, 80.42932828328742, 83.89661745819353, 84.66900613885335, 85.73019593799486, 83.28613183992756, 83.68531096712407, 82.86205230449251, 84.87090604958703, 82.70729357570922, 84.89208048605262, 86.45023533267549, 83.87707029955256, 82.4033031365955, 84.8452748651808, 83.93430641251842, 83.25496270313278, 84.41895233802582, 84.36965105564501, 84.28310681263658, 83.96824309155114, 84.26426429844325, 83.39308147011288, 84.6616342886359, 81.09658981239939, 85.83242632077982, 83.5029722087064, 83.79966756000037, 83.87918487604952, 81.95643200382625, 86.51085751643971, 86.58203121745919, 88.1815893645445, 84.31137359598532, 87.920336153802, 85.69191630900356, 86.12239475925534, 89.02497908243933, 89.97707978240008, 87.1462171307498, 86.88027172024469, 87.89346404534379, 85.57979708445652, 87.9514091660011, 86.80032693654505, 88.92523909062002, 85.94033641484224, 88.16517519409884, 86.16489815763651, 86.09922516590467, 85.36412118883946, 87.87006876653646, 87.41137411299916, 87.77208419887353, 86.00414713870485, 86.84420816670875, 88.47728346608191, 89.38572892670996, 89.52212302405457, 86.53915048922359, 88.26954519116053, 87.9612972133271, 88.07852807759134, 88.82553891288678, 88.54552855629888, 87.62608691951618, 86.21827681049025, 86.61979909761014, 87.62989919796141, 89.18429053910111, 89.05131816997121, 87.93974102959305, 87.36735191273303, 86.62631374751564, 88.09034424411877, 87.73716410152957, 89.50966442253615, 87.0625422278966, 90.74656869449855, 86.52921817489867, 89.2312141426335, 92.51645947787652, 92.25728794940581, 89.96235225333409, 92.29380602313093, 91.53716546044835, 93.76194383511694, 92.79464045895497, 92.7058198125884, 89.91883878236979, 92.65424095448104, 91.18179512039525, 91.4269656635547, 91.19944583975033, 91.40318527993776, 90.85027946830458, 92.30654133431439, 91.62574262030151, 92.90693140042227, 92.39379009556892, 89.64467520510816, 89.96280615238717, 91.09393286087406, 90.80275473506619, 92.2279448809553, 90.74614090928732, 90.08352201150528, 91.6300007334878, 90.8347770741757, 92.05505648731696, 91.78595983780855, 89.80464953578625, 92.58427917588793, 94.18704876112118, 90.83603076674554, 91.63240411607241, 90.06392835131543, 90.65757951635183, 92.34841841525915, 92.86420897767768, 90.20992746568152, 91.36156810698564, 89.51016572618154, 92.16856316370556, 89.49451798136273, 90.95135616372893, 91.1920991167411, 90.3482013406429, 90.7495231102337, 92.29752421684972, 92.94478721534806, 90.83337216437086, 92.75007415033127, 96.13753359613725, 95.57402709945939, 94.00624188786934, 96.01520573406378, 96.52977444408337, 96.16686725227194, 96.02251829456218, 94.70676627292823, 95.99790933024208, 93.1358532595682, 97.96221469797418, 93.94853264630154, 92.76564291980239, 94.76192574330962, 95.87427416519257, 94.68604989663014, 96.26244306679583, 95.09043916902182, 94.73493197780611, 93.28301476863707, 92.44964942933147, 94.10391576744568, 95.46175302326945, 95.52999330777035, 94.31120791901495, 96.50296104434429, 95.18299819056651, 94.38403892438951, 95.55736741764696, 94.66976805014593, 94.72629680075467, 93.41125525597198, 95.17489640631855, 94.96473134315842, 96.97452955004097, 94.02361656409077, 94.73462171359792, 96.05461077248373, 94.67240603315084, 97.0221841270883, 96.67713111501898, 93.89436335596338, 95.06422763735974, 95.85469883352265, 95.80182925845612, 94.87196460990477, 92.86413720204168, 93.99039892787205, 93.83777390809534, 94.45898902699311, 99.33161146003737, 101.7632933284149, 98.61405343118938, 98.26729184070501, 98.84480296855965, 97.59664458242266, 100.52881975912236, 97.3951082895001, 99.79154694938077, 98.4231186523737, 98.10453439777979, 100.78952735829317, 99.398317124211, 97.02973024305017, 97.14079808615547, 98.84778142327748, 97.30204533948196, 97.15833401688249, 99.72540935296698, 97.56214371954891, 96.9227233952203, 99.61534354945873, 98.42647415551113, 98.61325711083988, 99.17435997894795, 99.2967362128164, 96.36707480817546, 99.35153605173336, 98.71868419225564, 96.85699846015638, 100.49096516054222, 97.88206076867043, 100.66096231456268, 99.87284240360916, 97.94976771817176, 97.98537633376546, 97.62739234993232, 98.55392665877613, 99.07097974190981, 94.79137409635197, 96.63951424377123, 97.47491472874532, 98.44361228394047, 98.68249757888368, 98.82416105291293, 100.30565340257469, 95.78173115116488, 95.91511959903546, 99.26136333126566, 100.52313133908783, 95.47105173572375, 102.84325618875597, 101.10534806057927, 101.95002488772622, 105.02476774317377, 100.73173475208354, 103.98554783808133, 104.09943530142046, 102.3524915216118, 101.92058049770013, 102.1259400686911, 101.47083384504529, 102.31010788063807, 103.16080965217049, 105.96049402051277, 101.22914808567802, 100.08597748119308, 103.14958054527732, 100.64397936254208, 99.42993253602025, 101.47308786646371, 98.22431350081546, 102.70439610375934, 104.2729452978932, 101.97844013535097, 102.64670702618096, 103.04051128913342, 102.95857669769305, 101.05892249837214, 99.60034613565202, 102.0285897149572, 102.15563077774841, 102.39025259929734, 104.12051023384393, 102.97414481216184, 101.56329726516135, 101.97686726493838, 103.58912432344077, 103.78875944633477, 100.50323814019397, 103.56768897377655, 102.00778707216969, 102.24495521411409, 102.78928405347446, 102.17983704679615, 102.49098535069585, 103.14223820539317, 101.94274774583542, 97.3538640519632, 102.40578125888945, 99.61709251185448, 105.23203240082181, 104.46583651556946, 105.71752600847996, 103.72988243749379, 104.9756774356347, 106.81792696730147, 104.95246725156844, 105.4609316171545, 103.9801981271861, 104.97929059592909, 104.75397129938749, 105.41359429799788, 103.24822099086492, 107.18988672761307, 107.45226080229486, 105.41214183603691, 104.58448980412086, 107.32254466473447, 105.45381074322722, 106.92430827356532, 105.06978513782492, 104.90610903202273, 107.57358212839738, 105.456750600722, 105.55470442084338, 104.51647084031917, 105.25125250392452, 104.19837551019866, 106.79685668534701, 105.40561668058916, 104.58072964724973, 106.34961183562244, 104.54782086402093, 108.31998071788774, 104.6965121767676, 103.5744365702113, 103.66425437833949, 106.14184702140082, 104.34954261832192, 104.19352020044965, 104.65852733124541, 104.9318899161819, 108.8138345282673, 106.92649460964746, 106.77701394171376, 102.66180449538479, 108.6983356242458, 108.31960666756846, 106.55227855747867, 105.68811652969197, 108.35901512203321, 108.12780956621376, 108.89301239913681, 108.87047027465675, 110.9733644941883, 112.24374119779509, 111.0599424508068, 109.50747793428486, 111.30090503360232, 110.11170252449277, 108.10845412886547, 109.49177287237562, 107.27270259575852, 109.42191668430682, 109.98502937711771, 109.54701533305703, 108.54786738995813, 108.35932586525146, 109.28569991898813, 110.35354778546609, 109.10385192025043, 110.51680301062262, 111.24908116509563, 109.01661181508715, 109.52582869202622, 110.3816777181326, 108.11387189352595, 107.20688281657385, 110.01863653166798, 110.97024698856733, 108.90284341036124, 109.34054843019679, 109.02486063896654, 109.83893902095333, 110.45402002260532, 108.98632509305916, 110.1159707090679, 108.70808536395718, 105.01787906083115, 108.37255115946724, 109.57810097803572, 110.84596165486093, 109.28235383237246, 111.22650119771278, 109.11485036149045, 111.27223737262324, 108.71038330759463, 111.22011367732352, 110.17706258297721, 110.14444869551731, 111.02963543314281, 108.89754855337272, 110.52988430609655, 112.3438112197434, 111.82446121130621, 113.99719544667875, 113.99482398339664, 111.07726489321804, 113.2919988065953, 114.15180023154382, 114.2245422460884, 113.70429270637611, 113.88522578488687, 110.8476432109463, 111.08373702666904, 110.2552605663091, 110.14858739877977, 115.54120009360497, 111.9495540944837, 113.46877743621484, 113.69460990956715, 112.78181348556765, 113.65818935277515, 110.38562488406868, 113.46380706165861, 113.17220782694268, 114.4318244905013, 115.8900933325524, 111.78818508036824, 113.05834463853819, 112.37287690345995, 113.92329379408565, 115.39024331905956, 111.09923153559198, 110.32891542720886, 113.07028066592522, 111.3745215324876, 114.38470314733668, 111.29398771618482, 113.0787580458004, 112.46751512718009, 114.51259663337396, 114.65978821201249, 112.51506372534769, 113.66585539050789, 113.53579247997476, 112.22041777499066, 111.16411780093823, 111.37117726827825, 114.32129081245884, 111.23671202418403, 112.89505748518272, 114.16117451082415, 111.65475440416674, 115.44340988860694, 116.1960122246163, 117.73388391246814, 115.05287911856274, 121.0143289123855, 116.60305561769232, 116.91700694032731, 116.61804876990296, 115.64907225428863, 116.52472269469067, 119.25465463998874, 118.33428981153388, 117.43188642570777, 118.3513987563665, 112.30648210380225, 117.67729400510389, 116.8746559633759, 117.5673554082543, 117.84255892757044, 114.85847248255443, 115.22795519914295, 113.99230237257406, 117.4191916843272, 116.42651669810802, 116.74393837214141, 120.01867131126299, 116.82799085056732, 115.56356496608248, 116.5233955879722, 117.96114977479587, 118.99452507075407, 116.63036126998418, 116.13719061900849, 114.09448802282472, 116.91709175956264, 116.2083235977178, 116.9645497002332, 119.36169484495063, 117.25141977677917, 116.87482293692247, 119.70974873004857, 117.68490689132481, 118.10868668684135, 118.41848554983413, 118.14872542521547, 119.32930742645614, 117.02183206990343, 117.64815589204157, 117.19791673278787, 117.0561102443148, 119.0386638793645, 120.92976605471526, 120.45584228213974, 119.28546148731344, 119.74659709761592, 119.91098186680284, 116.97758581804757, 120.44372132477035, 120.89968039973873, 122.64275472758726, 120.564357318077, 120.2095549782228, 119.83051118177445, 119.2980983344244, 117.77244021057277, 121.02184916753781, 119.57296675240119, 120.92785564936474, 120.77514948492271, 120.38834473692813, 119.00079238535588, 118.32571423050659, 118.14573469242015, 116.35493567793756, 122.75924729215076, 122.15265789228576, 119.10753834752249, 121.11838833834729, 120.65665629995169, 116.6366653036829, 119.4564268278058, 118.84133005383849, 123.48219536022202, 119.97488766669062, 121.89745323038132, 119.47959587842287, 119.86569284150744, 123.00623619603255, 122.54131801736469, 119.40788856642806, 119.04604311257526, 120.61047221144479, 122.60977128797978, 118.05929346468488, 123.36423364826986, 120.75972329856889, 119.53080922987897, 120.86822820618163, 118.18553136825018, 119.9217594858833, 118.03805365763294, 124.55304095716843, 125.13176093592989, 125.26590041647087, 121.01650899313198, 122.64105253739544, 123.17110805289637, 124.81815916283966, 126.16344382142744, 123.99160254817097, 126.82581274411943, 123.25605608518595, 121.31978937117663, 124.32324737260552, 127.68447383727627, 123.24496519155501, 122.54380023337264, 122.68587181013471, 123.21609292831226, 123.53396473614903, 126.16551042156446, 127.12553910693497, 122.9931528946597, 127.35370663204749, 128.89047119135134, 125.20415626672334, 121.59641537059527, 124.76625899045257, 121.97704054337507, 123.11851037188866, 127.21015224475521, 122.92991244231145, 127.02202553579232, 123.44048370658527, 127.27822339392178, 128.41724390759322, 126.20968500179377, 124.40851574266716, 122.61350521382272, 124.98169197897664, 122.89920274516214, 123.52318084368059, 126.31683183828493, 120.65918062769909, 124.19621807042496, 123.17234370864077, 123.86056073394182, 124.71803924562339, 126.07534219254894, 123.78956591405037, 127.99700193807173, 123.60877941213337, 124.97616068803381, 125.19867695122555, 127.09662651458392, 125.86747390297631, 127.60780885103343, 130.56123213266858, 128.86435079871606, 129.8031481573317, 129.7698285189805, 128.598755086799, 127.93585415347133, 125.68404656089967, 125.49586083436631, 127.79882329435118, 125.53824514621138, 128.57816959056353, 128.04063664068806, 124.65568581663489, 131.59106868625014, 128.19628456254244, 129.17817115056025, 129.0893562523882, 130.2537203322322, 129.7323291447125, 128.8657992448662, 130.13500828463162, 127.44326807289377, 125.96288286563433, 125.97474163286444, 129.1475229301177, 128.63294247996217, 128.05181547009605, 124.73592404600576, 128.27116873260692, 127.75231059055038, 126.1297788062571, 128.815866938996, 127.45633870373449, 130.0448371846741, 125.01363980768359, 126.66600237423656, 126.47262172925295, 126.82820765536053, 127.52535366301991, 124.19899165215153, 126.09626338736149, 128.9081714054943, 128.92862114236667, 127.47677985936502, 125.90555851697361, 129.42706545505754, 128.41402028232247, 131.35294066779736, 128.54789867259203, 134.62162120566754, 131.89840034337328, 130.0196730990067, 132.00337138436674, 129.3675227753661, 130.40169474615575, 133.55564808449137, 129.33491416157537, 130.6522452634026, 131.87179309954874, 132.08087308919949, 130.4307028217281, 130.61169411880442, 131.988772652064, 131.78923883347161, 131.79518287643708, 129.8884468520243, 130.78340874098288, 130.31102126919313, 130.46278843697377, 128.96472138380201, 132.17686740144816, 132.34458651006554, 129.62323888470365, 133.15562019426696, 129.22120506336293, 128.92203451859748, 132.08763992267856, 132.1152443256617, 132.11403112678053, 131.40460618938187, 132.33539768170624, 128.5953497966991, 132.23714757579785, 129.50071559441912, 135.39192521071664, 129.5179600226996, 131.45994411286466, 133.27367966257657, 132.46481809504573, 131.0634960016889, 133.5218006894515, 129.91026920010458, 133.17354092893575, 131.6443934996015, 131.5925155591376, 129.64431091337957, 129.01100609817385, 131.16487882777628, 135.80958880876835, 135.2480799520641, 134.1378676699565, 137.05999739279494, 132.33663809790045, 135.9481509681703, 134.99161358915217, 134.6860219943675, 136.87094190517365, 136.4741088705736, 135.15446983637375, 132.81513204071697, 136.12278219870373, 135.58865554903764, 134.99686983700335, 133.29605038430498, 136.1460309438563, 136.3236790292382, 131.92505306779492, 136.3780876364002, 135.94742111428684, 133.43672167731694, 135.8218455242374, 136.08307998035778, 135.93754853515878, 135.79978142848765, 137.2634311233706, 137.99468408777238, 132.1537057193668, 134.05774577563218, 135.00218014016684, 134.81821154053853, 136.111289532111, 133.226473847418, 134.56033040182334, 136.19495457225236, 140.11376983515987, 135.8898903150689, 137.21792166573553, 135.56053093504264, 134.9385691231862, 133.29530519008696, 136.42749623073627, 136.4515175462246, 133.5544665265594, 133.33483476610263, 135.63216787668267, 137.39460801024694, 134.1240948098161, 132.26620916828372, 134.45992023416218, 138.37414741332242, 140.66386651864906, 138.6639607598781, 138.12786690474869, 139.94450084184172, 139.47074634384907, 140.38746998009253, 139.90470414296175, 142.1573039771301, 139.21670336028185, 141.18967541646708, 138.96488622239315, 137.25452479128006, 138.9671340510434, 138.43441831423794, 137.50993374863276, 139.50915229160148, 139.3951546832496, 138.6972688839497, 137.5552558584433, 138.63020528764042, 135.2189214622384, 137.94249413458977, 140.23289270835087, 139.143353514484, 139.1208456660128, 141.05236745800025, 138.36569015373396, 135.50874987190386, 137.9375258330959, 138.03680220732858, 138.71286073335938, 138.24951216613994, 141.48314755401063, 137.22867993637746, 140.92540532696583, 139.05918196161338, 139.28239216013057, 138.8967914201373, 137.56881676434918, 139.92018964006692, 139.92456986386, 142.37176133382124, 138.25746681447626, 138.866671401712, 139.35467932738317, 135.56403124666954, 138.56585122401518, 140.90681149502163, 139.63206609755332, 136.59706712244207, 142.9395258496835, 141.25834403899967, 140.21234198279348, 142.05960742573046, 145.203551112994, 142.39123278417847, 141.37268732224908, 145.6950995539188, 141.4467621124639, 143.83477251453533, 140.9203270906759, 144.28727055047608, 143.5551692480702, 141.57235713567746, 144.91590595329853, 144.369122378632, 141.93452800075872, 144.4755917228798, 141.59276187450652, 137.9379807721604, 142.8431253219927, 141.48031836925915, 141.99286132290305, 142.54636315215834, 144.3719470329151, 145.79926950942283, 144.4425797662734, 144.48031770710864, 140.7707739705943, 145.2530668013944, 141.9378647046929, 142.64781566144848, 139.91569832295903, 144.045155237042, 144.39092561586094, 142.37493130399181, 142.28954562484736, 144.6519615051949, 141.72235383401102, 141.85747418001975, 143.57630377039806, 143.13122611015987, 143.76956298018473, 144.4673371094757, 141.5002014605908, 142.27771057273472, 143.55855665590926, 143.80804384349833, 141.47906912063755, 144.67964550041896, 141.037197518636, 147.59784538586894, 144.42236375445933, 145.38063439392621, 144.82916584325548, 145.26933850553482, 146.91305196289673, 146.20731815538255, 144.93768964934685, 145.96081750140078, 148.01783364337228, 147.05587834498021, 146.12839269272516, 150.1247416653391, 143.34339229229855, 144.29997249143432, 144.2281298306611, 147.688667531959, 145.78994127654266, 145.161439019985, 141.57673444991286, 148.47335498868256, 146.95220976213716, 146.73119009970296, 146.84392736222028, 146.55507771128762, 144.68940675807883, 144.08642446182552, 146.12121886560104, 146.1395296486424, 145.37733672435022, 148.21575692974682, 145.84168108290808, 150.03068967368816, 147.2554383079447, 145.3471134435051, 143.12936622311807, 144.10784721651441, 147.05254881870454, 144.38397248853823, 142.3153027175821, 146.77733873003223, 144.3209928864419, 146.92325826311435, 144.1469258709586, 147.35778622154277, 146.41940335847008, 146.4981580499231, 147.08228454822444, 145.56075184941864, 148.57414147641217, 146.65835250692263, 150.29709238185464, 148.64629063333814, 148.49413703580615, 148.56798691958136, 149.9379321827305, 149.66536293860457, 149.44134481725084, 149.65813410198118, 152.36821073815747, 149.39087867534153, 152.1435603522637, 149.5961936698538, 153.24475092203753, 151.34155064054244, 148.29270563356562, 149.37309985052502, 149.58139402767432, 151.96051980852386, 149.36810674773005, 150.68889829439618, 146.1512138513764, 147.54311716270342, 152.26573917710957, 149.19168297005302, 151.25687822514934, 149.61557220768563, 149.21573283288035, 147.72661301832076, 152.0935892054569, 150.52862914953647, 146.60205835151106, 151.7461262730723, 150.11489393439993, 150.66470470861245, 151.53819518160137, 152.7181471157033, 150.8367837626217, 151.9658843340411, 152.1286076027891, 148.6563589650425, 150.13843170571508, 150.58833145477067, 148.68688636008983, 151.50133678971878, 148.01273281945998, 147.64609077339293, 151.87524188576666, 144.93934128927086, 153.76073700820913, 155.12583876479889, 150.39764279999463, 155.02563786902095, 153.75516288339708, 149.89219763596708, 152.67373973536837, 150.10215001240422, 152.1131046909187, 153.28150967309273, 155.0639597925882, 154.69388305538482, 156.10703306788238, 156.70027162334657, 153.35263919064585, 153.4189784627192, 155.32868317183463, 152.40072089975376, 153.29419713541964, 153.52491571219306, 148.94665556059647, 153.18049606508683, 152.67279746137413, 155.3565308641462, 154.30822406609005, 149.60302640066266, 148.75362533326646, 150.53394095025374, 154.10552728748797, 152.22542879061157, 154.60785833559856, 151.7230876653698, 153.95192878637468, 154.76488051516745, 154.84845916057597, 152.61800222437438, 148.87135627319148, 153.3721461763796, 154.44423489379773, 152.02594782988234, 155.57404007578822, 152.83531622231143, 149.4525633605125, 149.1712661466354, 152.70465192281992, 148.0186622390525, 152.79976728675157, 153.0774989019904, 152.12707856365006, 155.2027085038604, 151.45471387039208, 150.55234497353578, 152.1466781210492, 153.43533585066024, 150.43337821985673, 154.92022138596622, 155.47341191224805, 157.95157049868394, 157.03581559347876, 157.049986228848, 157.52454194760566, 155.1615958377791, 159.25493850649445, 154.632051768697, 156.07619384396446, 158.83765732175934, 160.04641570398945, 155.4058086882593, 159.58777603713344, 158.65446943765537, 152.68900904803826, 154.91012913975104, 156.50505142327782, 155.0761298552375, 155.40067871442278, 156.15359911139822, 154.80679351634186, 157.84535638435034, 154.40223903970082, 155.4332867785701, 157.27411218979992, 158.68346254065005, 157.72013658507782, 157.40253789364968, 154.3540166945232, 155.72476948069607, 161.24412691018028, 158.91827618243167, 160.44559941508066, 154.42142701873445, 156.80265625500752, 157.71737146330318, 154.99145591838194, 157.13385685306923, 153.77044362961618, 156.7181699438968, 156.72055013475259, 156.0829454847014, 157.5651829432412, 155.76292353130975, 156.15529621708404, 156.7261974785676, 159.9043859380002, 156.2957100569775, 160.8992366123008, 160.41692364284086, 161.3674480760947, 158.9837163748645, 160.40584777395904, 159.88894434785033, 161.18519595507104, 160.20493605200159, 161.0734102548053, 157.96105927919487, 159.3293431012498, 159.5252081532788, 159.25621767689412, 163.85704585790907, 162.5097776660029, 164.6607375451111, 162.0600313980937, 158.9874142648173, 161.37552270795, 162.1173606204652, 156.28436473928895, 158.70760531996908, 158.800959382767, 159.27701153891198, 161.70527922426731, 158.665785276176, 162.28195387131183, 159.68567050664615, 159.33993010955567, 163.89926243940934, 160.2643752410649, 159.11026072898147, 162.3581223504276, 160.1472394776264, 159.16609997148123, 159.92743098743554, 163.84662185483657, 159.17540650558172, 157.81103047830894, 163.75280343488575, 159.73487961212055, 161.1246494956377, 160.49081975854747, 158.0426893690961, 159.78719725661597, 163.2391270366442, 162.8477457072143, 158.43078296325854, 160.60115339074713, 160.0970397435194, 163.09124348671278, 163.50486198206983, 164.62332713152185, 166.67470517692018, 163.23292910016661, 161.94706773295923, 162.1943754628848, 165.2014916482179, 163.0553860097317, 164.54759980778357, 163.42907488507112, 164.19338733733022, 163.21018735905028, 162.3272134790535, 165.94925736716334, 161.91248902182278, 157.8644878873771, 163.2261162302494, 164.6612950694626, 159.77520969835192, 165.0408867652753, 164.4851125825591, 160.81812575639296, 165.80849457749213, 160.4003971267163, 164.94098457591932, 161.54917382499605, 162.30213594930723, 165.73069569039257, 162.02748813217747, 167.46729649823132, 161.58261149751388, 168.24167985100232, 166.6892905991618, 162.88499933646153, 162.8622558264339, 162.18700197400113, 163.63442761480448, 168.62777755608903, 165.81157401368793, 165.17640752999415, 163.234946549622, 164.16725605550576, 169.282744797951, 163.32501235870413, 165.14090491220708, 163.63377793483497, 168.3989543541187, 163.66670054405228, 158.83240539760735, 160.9633051442773, 169.25331080727815, 166.2101319103573, 166.69796336335602, 167.48433269854877, 166.66956260041587, 169.00232005043068, 173.7580774577234, 167.55453785908404, 170.32819508813023, 164.66095385601844, 168.08152388790995, 169.71079812869274, 168.04375987507984, 170.490448055221, 170.79789559588068, 164.95106324241178, 170.38620892115523, 167.21336061480042, 167.8504401156412, 163.67141025831842, 168.73474857838102, 168.2345028346398, 169.6408359936913, 165.2691553629345, 170.559905699582, 171.3103965770012, 163.7636765707962, 166.16509910694188, 167.68961603836664, 168.7874902791229, 172.09423017841905, 169.8155338446848, 168.91309328493344, 167.26861288123067, 166.9078862124943, 167.95663147924563, 169.7650974706467, 169.1790311387922, 165.67750202065943, 170.12331079381585, 171.6425313902874, 166.8099738944453, 168.8892778004655, 170.33763315106887, 163.80099407672103, 167.03859836310545, 168.73503855285995, 169.14624379930063, 165.61714501624377, 164.85639730135065, 167.49848036376136, 169.74214812912632, 166.92425525867418, 170.32067642093295, 175.08952892329538, 168.63627907088238, 171.2844811973251, 176.19422269762282, 173.31531681897607, 171.69379279439488, 174.78287437687507, 168.71503964037726, 166.48337845859348, 171.69801088313335, 172.68275557084255, 173.3931181643393, 171.2876350183299, 170.4918284520588, 171.07044254712022, 176.2760762316896, 167.44802700261104, 173.67912131590813, 169.81905720179427, 178.74293539639115, 172.45460908230012, 177.53959337537782, 172.64574578772812, 167.20887589583012, 169.51950011619155, 170.089540445392, 171.57296826048352, 172.3632485276316, 169.46610436650113, 170.28592170109218, 169.7373675028361, 171.8661349905916, 171.4188491597716, 173.18373547824365, 169.97899621214825, 173.52423525513854, 172.84408571322106, 175.40338078940184, 165.5437604261391, 168.0215296190224, 175.3802022057821, 172.35272640113536, 171.59246396698214, 174.6119137943203, 169.7065022549007, 175.6650564186095, 171.15184444479374, 171.38512224948514, 168.13724451005695, 172.90807380456638, 177.77494139444678, 178.2509245928029, 177.76712210264745, 175.22400352301366, 176.99236425986803, 171.9100142402038, 177.74162304638477, 170.50703922648577, 174.21441203365853, 173.93275454608627, 177.66926430395839, 177.68522143885178, 175.1503225751586, 172.4297970981299, 173.24459091288747, 180.78450154889532, 175.23052869594707, 177.27349612622717, 176.2152711241907, 176.62012682182524, 172.6968593475407, 171.32772344252734, 173.18690910239891, 172.7199459724985, 174.7315469318884, 174.29632210549363, 170.54223675652608, 172.11586567025083, 173.4195562888063, 176.03438466414883, 171.56927014906404, 171.42155711889447, 172.68074045600088, 174.33317385157684, 175.24773639915884, 176.92540991818413, 173.97813067601084, 169.7203332121875, 177.83328700832212, 175.92493948325227, 179.48597951387802, 175.69818329602276, 173.35120158026896, 172.3428646092328, 170.32945861044988, 177.37981492712922, 174.19350766308335, 175.6087799778463, 170.10481603177783, 175.18144156643066, 172.42389988364116, 175.32789683953143, 182.92564741846752, 177.4666981380534, 182.1650943685068, 182.1805539990868, 176.61904046180072, 181.85078348481287, 180.96277456914925, 184.03355815273514, 179.68566231378958, 178.34465658211766, 177.98260797656707, 180.2632063218344, 177.8227384648258, 180.41289383677557, 177.19514224438373, 180.9981214406508, 180.22556297879197, 181.87179107824448, 177.83604065999407, 176.34222476548962, 175.27045964086085, 178.78421297221215, 178.6550732690151, 179.02632403993442, 178.7041752584792, 176.89977991659399, 180.4734722777734, 176.8123367979201, 175.25649381407, 177.39977803001037, 178.09550025692525, 180.92583592015015, 180.19773977757706, 178.67511609324023, 179.2064135574837, 178.20677579525315, 175.88091856398165, 184.0203485037789, 178.46212465193014, 181.94218842321123, 178.30320414683655, 179.5221286625421, 175.5586370781179, 180.00655053714303, 183.56070172733564, 179.0445393012478, 178.76835693729637, 177.36989619899217, 176.6185853276363, 178.61339669784167, 184.1788026787486, 179.28647388415277, 186.25622915553515, 180.76927850638023, 185.60510340791453, 183.61498229879382, 185.1205629272129, 180.19115009958287, 185.4628114078752, 179.41862333851034, 181.34546318483373, 181.76796605902163, 182.58833896617935, 182.14552985940517, 187.40900379892608, 186.41571147903258, 182.60387868932605, 181.06713316688877, 183.15415466814468, 180.96246969370756, 180.47851655943344, 179.93912209045857, 180.59252213742792, 182.91328975673235, 181.6235340767257, 181.5822970423535, 187.216798935942, 186.29738091588996, 186.34514329532993, 184.41812355116497, 184.43039522594626, 185.65265415747746, 185.287833363463, 181.19913798838542, 185.68072789762326, 181.65734647081914, 181.93765465755146, 181.56335877532575, 181.48639908637654, 184.45016448117644, 181.0723386399052, 182.19256251974798, 185.8804095183922, 182.39183630209942, 184.57683048388463, 186.1374102636569, 182.9157709720708, 186.88423945468304, 179.51749536530383, 183.9517742881271, 178.02083955096336]
sigma = [0.0, 0.09988281801061111, 0.19800378850039999, 0.2946440222048602, 0.3993539101285247, 0.4953244380653731, 0.5870316076357055, 0.7062926157055878, 0.8240909461658811, 0.8622448536424864, 1.010068086507012, 1.1082359077249848, 1.2136793906964647, 1.29978095502386, 1.4193373296502036, 1.4959059689003138, 1.563862462943991, 1.6463527885433231, 1.7966914832289427, 1.9487521381400499, 2.017766269382184, 2.054765214467552, 2.2601687599801163, 2.285618500376977, 2.3768030850368542, 2.506329741469612, 2.5283640113014445, 2.79182105446574, 2.8807921226629807, 2.8911926319440737, 3.0420857313058467, 2.9952200857736617, 3.1094014737313938, 3.2660625388123523, 3.3693762672535494, 3.569724727076082, 3.609735766518611, 3.7896866574633017, 3.7615689973801123, 3.950534882137637, 3.963312219956357, 4.041660096131445, 4.1405043346848345, 4.330595225963582, 4.431997000769484, 4.474756989465001, 4.612387674462298, 4.642072588510058, 4.735810652913133, 4.9504905789999984, 4.889490782149091, 0.0, 0.10105398329942775, 0.1990827906726152, 0.30087968032941953, 0.4089562137332015, 0.4916112793378952, 0.5640964834154293, 0.6940130736271908, 0.7988165912748308, 0.8985359629814762, 1.0114009898632343, 1.094669106804123, 1.2044915585275513, 1.302062616516594, 1.416131941159907, 1.5289778310164865, 1.6267178107507576, 1.677450283301039, 1.8222025238066637, 1.9270165636601926, 1.9708227833195957, 2.1686376324660124, 2.21832963547508, 2.393338220706209, 2.5021429500089685, 2.5106830848218844, 2.6421889649293906, 2.7009352415471515, 2.848532348035688, 2.8921474497954485, 2.963114320368137, 3.0770866702102153, 3.338780185041385, 3.2306281013247955, 3.3048345491184765, 3.4683222728850223, 3.497707120760717, 3.7262888282970126, 3.8103783353131697, 3.9202373164866167, 3.9550607805535303, 4.130594833597674, 4.253499173110724, 4.1671556138191885, 4.408999511455191, 4.512626675537706, 4.700500517687202, 4.637993675526797, 4.842007231016289, 4.836711191065356, 5.057720600640033, 0.0, 0.0996393996718102, 0.20303968986482124, 0.293473861420666, 0.40202988073505797, 0.5081319281192613, 0.6000191820299907, 0.7142422592500801, 0.7717863435456459, 0.8967335205939921, 0.9957844917315563, 1.1120642495680104, 1.1650903472351002, 1.3138297761791173, 1.4162186703855937, 1.478050754311021, 1.5754978085863285, 1.730483503907876, 1.8281999928671453, 1.87693920564588, 2.0252672868908332, 2.075301565327094, 2.2262858397688277, 2.3117656968646942, 2.379514308437575, 2.446585088589852, 2.421248575634573, 2.6627930558709085, 2.83201573721354, 2.8673940054749094, 3.045091606917453, 3.0287134051755285, 3.144514399555914, 3.4600485589830297, 3.483696628371729, 3.4100126182722965, 3.4446873767806427, 3.728023124156542, 3.792882479891469, 3.944346526195476, 4.053572843895112, 4.115010742043236, 4.233406942364791, 4.2780772487896135, 4.472591186434531, 4.386560205523152, 4.724946312439968, 4.6417035598257605, 4.831063428221491, 4.907930462884645, 4.963021947827538, 0.0, 0.09719505881872863, 0.20075529782946955, 0.3109586374355899, 0.40119270041560356, 0.5123820255399965, 0.6119234922239407, 0.6797404350979103, 0.8098050440951401, 0.9164511807995281, 0.9642576216953294, 1.0877999035790478, 1.1824847576915944, 1.3245897554428634, 1.390089703410122, 1.5364072062914929, 1.596109102894163, 1.7335723654970772, 1.807129395059339, 1.9078930923481263, 2.0644871011454105, 2.086716624748068, 2.1953041492642775, 2.290696767388196, 2.441915827099438, 2.540849316804752, 2.5141252133090792, 2.729345180049393, 2.9482705464112806, 2.834645652003359, 2.9950318262505045, 2.9580474251299664, 3.1703465851751838, 3.2791801377225234, 3.40645017383587, 3.390523311670446, 3.589887719625429, 3.6075478865718686, 3.720173496456612, 3.8811461236700002, 4.042912790083282, 4.142381380668726, 4.198434588456506, 4.3340658986443295, 4.422307750891166, 4.732250413203366, 4.631027863967856, 4.749383423615451, 4.84748132743337, 4.687346768652299, 4.991682336210346, 0.0, 0.09856355607920701, 0.2014262245291111, 0.2925008232284095, 0.3971343255816217, 0.5077632438197796, 0.6105573761176167, 0.7101068565228563, 0.8001514175961911, 0.8976201165985737, 0.9878255702119121, 1.1310999811399756, 1.155209523859476, 1.301487480300159, 1.4252845034038644, 1.525481632406872, 1.6026131621479311, 1.6613011128445423, 1.7680332877391216, 1.9137033578094003, 2.0279009697358137, 2.1174459392888956, 2.235139668433093, 2.2899878717773308, 2.4520193177554748, 2.5337536781218137, 2.612948428382783, 2.644682381555695, 2.7947379816484426, 2.8979294763085517, 2.956399847538274, 3.1813104072117744, 3.1366374443460674, 3.418884439850504, 3.497039464521762, 3.5581605577728506, 3.518185901234347, 3.7621099254982284, 3.832845458433354, 3.9088546137036984, 4.160016880747291, 4.2525644767936015, 4.18427683438656, 4.254863151433747, 4.362931048599815, 4.619123757772348, 4.657196761976444, 4.564436532137386, 4.734793017642663, 4.870746882677065, 5.01344002598725, 0.0, 0.10023653602232216, 0.20344808608254022, 0.2938663381095569, 0.41106391674515064, 0.5065050302484175, 0.6026410767614288, 0.7112718218883313, 0.8238226391480077, 0.8910514046630449, 1.0054375391595183, 1.1331692974907692, 1.2279635293634592, 1.3479425286373286, 1.4155510424768054, 1.5121657450090356, 1.6192494609921868, 1.6969310223411203, 1.7953621643233082, 1.9006162778481657, 2.020115254013893, 2.1202667621419695, 2.109106490534124, 2.2203440299007964, 2.3319780051303085, 2.540631662710043, 2.6199915749785085, 2.6461928438392697, 2.7897364221396246, 2.8452052031429775, 3.014862894480174, 2.9881127894230906, 3.0938724324049525, 3.3423242844815904, 3.2484305010486887, 3.5537299194624445, 3.6420067594266703, 3.6648885003779577, 3.937928846923559, 3.8384285082731324, 3.963702680058913, 4.0633687701519134, 4.262894314277704, 4.207378407343009, 4.367355322350423, 4.574697579659867, 4.498040612027212, 4.601613094751894, 4.949422480027551, 5.058856702961332, 4.988669258228707, 0.0, 0.10162185254383665, 0.19822047774233284, 0.29763663360977316, 0.40412116493143607, 0.5021545909008982, 0.6040797587992269, 0.6855051190002305, 0.7986747624701583, 0.895468472125343, 1.0243172936032487, 1.0997584235874789, 1.1852527270154192, 1.3020568486159965, 1.41258587934677, 1.5287099494326613, 1.5881945962429198, 1.7051129340969275, 1.7839082301444784, 1.8570277202791836, 2.022885700790088, 2.0831667988843976, 2.18301734246266, 2.327036524048721, 2.3959303827537317, 2.433858412015375, 2.572741185672705, 2.698680600820556, 2.8015301282114935, 2.841816331481122, 3.0325137675273273, 3.067298991695895, 3.229274571691402, 3.293193225520839, 3.420810823534402, 3.463833892304042, 3.628614606185408, 3.6936988995974183, 3.9139414050194117, 3.8310575760352297, 4.019720724610271, 4.036926685667241, 4.137218706750983, 4.288410660882192, 4.355820298978952, 4.478822140848406, 4.607993898287957, 4.757177298269641, 4.659845402187704, 4.863757383503745, 5.047542775690666, 0.0, 0.09867036902197884, 0.19920140036696568, 0.29809700353284485, 0.4137673001252979, 0.49244533393682655, 0.603233348250565, 0.6886389590066606, 0.814095462966965, 0.9243063630325898, 0.9916281878568339, 1.1089302977182394, 1.2178192239349568, 1.3164358158662717, 1.4503195797850859, 1.4764377334170597, 1.625909762737608, 1.6840244542397313, 1.8084076119706691, 1.8864726557638016, 2.107865759832395, 2.050905649994129, 2.2310917968467274, 2.2787421156204184, 2.4382358482182, 2.5052797828418765, 2.6210572640664043, 2.6701181965989083, 2.833209083105346, 2.872127834037359, 3.035280382780813, 3.011471343373917, 3.0924515955422756, 3.2859275499799674, 3.4422558645912074, 3.3941420669251974, 3.6004028106583257, 3.6272617149551887, 3.7086731245829805, 3.8670573625412734, 3.996289911005293, 4.002024581675393, 4.14535317994226, 4.397063687405504, 4.241645515755483, 4.3628129093614305, 4.7383129632436845, 4.820955225843993, 4.780581893358884, 4.812160597094933, 4.998743694126693, 0.0, 0.10016763945831042, 0.20410134541021807, 0.3127271763442199, 0.3914234307949448, 0.5059993216797753, 0.6023976541016329, 0.7013658481845637, 0.7944546490345916, 0.8728916882037052, 1.014301936953247, 1.0983578574513067, 1.1942615825633525, 1.312900356260393, 1.401005015248108, 1.5281188216417398, 1.594415746801314, 1.6619078611103968, 1.7467319312926517, 1.889996227255576, 1.991612592054495, 2.0565744104723565, 2.2249921207260894, 2.312998821258826, 2.3900976726448735, 2.5363227824235137, 2.5299336370161662, 2.6359536524983342, 2.776501763768943, 2.88181317816715, 2.966500128713631, 3.10435214548166, 3.2643280061724957, 3.272590290465059, 3.438412122836224, 3.376776818921241, 3.6657458233308073, 3.7142060511403754, 3.7704936730501664, 3.936357323559291, 3.9707822067513345, 4.053186145292189, 4.236744897547928, 4.1637058134361355, 4.306128813235679, 4.5014353740403115, 4.506242857321227, 4.634537771288237, 4.90053165160078, 5.049117396871289, 5.085516149603392, 0.0, 0.09909370709854412, 0.20145678235291797, 0.2940201367371701, 0.3922345564277216, 0.5065570181035547, 0.5941110348392914, 0.6905497968414834, 0.8047392725390343, 0.8947765378880506, 0.9986004649839202, 1.1231359117621074, 1.2128201519038455, 1.245977911188933, 1.423900614184568, 1.5412950475984204, 1.576940463773831, 1.7432297113780983, 1.8072139360245507, 1.9606857142015228, 2.009495186742763, 2.0830579295145366, 2.248807050750766, 2.2490709042487462, 2.3973610077406975, 2.587096114767729, 2.616435155463901, 2.7894475828114156, 2.811971887335412, 2.892466097528061, 2.987496535956856, 3.1601763312843967, 3.120404299087282, 3.224605722420626, 3.388169227063625, 3.4931510598060376, 3.529368599228806, 3.6889270460307406, 3.6439889453470076, 3.882569092407158, 3.975362429985699, 4.084987391407062, 4.063185856479354, 4.285489208699773, 4.326213313423788, 4.5349505259586875, 4.700162099309457, 4.705828666544305, 4.893199707722839, 5.0180702901602965, 5.016382076677113, 0.0, 0.10514054025180108, 0.19645315893886356, 0.3052994766996596, 0.39634087000542534, 0.4893117874499619, 0.6125431494717457, 0.6981821998226937, 0.7899656334503194, 0.8779008636091076, 0.9903240765284079, 1.0995847637063791, 1.2194103677777035, 1.2972525532505128, 1.378043897184945, 1.5300951321053184, 1.6021039068872247, 1.7012018680695709, 1.8550141382341203, 1.911730627112708, 2.05654047189229, 2.1171020056635013, 2.181697293772946, 2.317840251244299, 2.4411354408627552, 2.513692070169397, 2.643456886983264, 2.696316663611798, 2.8111823580717417, 2.8599426507803085, 2.9599907928266704, 3.1162306588450264, 3.219812534558487, 3.346774246476629, 3.5184680177873298, 3.3378182936847436, 3.5760598563223094, 3.5012544804964327, 3.689539262136651, 3.9031912542108294, 3.977520434320233, 4.028537085107715, 4.255503828001476, 4.252382927592635, 4.436299893405506, 4.455463245436955, 4.654614972582749, 4.692040539290466, 4.683121894991657, 4.741229631316125, 5.066495462812199, 0.0, 0.10112493369099872, 0.19573525252117854, 0.29458455478976886, 0.40622097075050895, 0.49851991008803287, 0.5941729592631397, 0.710857697344696, 0.7873864570866748, 0.8942572862216814, 0.9682896602448751, 1.0975982698461122, 1.2258856145247927, 1.2837730212318617, 1.4007552363036542, 1.5378430747013263, 1.6484683196883554, 1.7177843508762398, 1.7875048712147281, 1.9443118466087712, 1.9642212862494268, 2.0871746955535038, 2.2630156479440675, 2.27465260469762, 2.3829514204388325, 2.5191539272060446, 2.5388980149525575, 2.7001141150212553, 2.8551195532104403, 2.8500591472010024, 3.029739408937713, 3.0661465786786777, 3.24738937746462, 3.2610407824478953, 3.361526850328149, 3.5285449447090897, 3.5449602177987916, 3.7779446003474657, 3.903034927776912, 3.9399864551868906, 4.018461474187369, 3.9967033916805557, 4.055038469785813, 4.330417985714843, 4.3766331842840795, 4.469758715450839, 4.57015186052542, 4.717074491895608, 4.811973356580618, 4.940320583332836, 5.012914098555687, 0.0, 0.10131030062552665, 0.20414643984773528, 0.3045841267766316, 0.40471400188563905, 0.5005235653187395, 0.6038242070613328, 0.7089737437217305, 0.8021254161064875, 0.9005971584914596, 1.013692459170513, 1.0767089725748837, 1.2052098046857358, 1.3032487094893823, 1.410204671740309, 1.5503490059697689, 1.6307067798966022, 1.6781440185384473, 1.796865067726239, 1.843789886119732, 2.0285337999749053, 2.087074686668605, 2.196411553314702, 2.316572836507865, 2.408887314789015, 2.545906042609225, 2.5933932068345835, 2.725069834438915, 2.757946445447238, 2.9017331619793323, 2.935944707952, 3.1203897699921854, 3.214545920406516, 3.3106720986271503, 3.340981373796323, 3.4515630959213053, 3.5902951525088302, 3.6870907687121255, 3.8028658861040476, 3.9060203304505956, 4.014106324511991, 3.996223553260782, 4.131281683241956, 4.388195187636629, 4.4908455412383805, 4.576741626902811, 4.678472024938703, 4.676631797288988, 4.600056873164822, 4.945782052044803, 5.009783906311561, 0.0, 0.10217000817308984, 0.20105690031428436, 0.3035497868112063, 0.4050916227255177, 0.4971107091772262, 0.5695220466653285, 0.6861374270585389, 0.8074343376568672, 0.8870866523137151, 1.0027156192218596, 1.0678247893315729, 1.2214993823485947, 1.3294604403393273, 1.378652015756473, 1.498688714994024, 1.542846786278862, 1.66839295611631, 1.7797549128558385, 1.9094686024910335, 1.9737576801801997, 2.141074268928704, 2.189533794987383, 2.246530381490097, 2.337560810827476, 2.4630190434950707, 2.598449458398108, 2.6116411775056765, 2.7816982925972527, 2.987300426625696, 2.9231695280733203, 3.084477934134763, 3.225232365831386, 3.227636605058939, 3.2611964747281217, 3.496006755301817, 3.59222247443304, 3.630737880873887, 3.7202388938070343, 3.858421967689779, 3.9500510006396494, 4.129665171980237, 4.271265499384965, 4.262543705833101, 4.440260995351781, 4.426861502008541, 4.629407294693354, 4.760173765274968, 4.80419511526173, 5.064601387648712, 5.097677419906331, 0.0, 0.09940779959321532, 0.19615009835593156, 0.3055130673134844, 0.40616320640286313, 0.49904917741943583, 0.6162073234239198, 0.7174912177414202, 0.8069938487257065, 0.8927584479204913, 1.001647599255439, 1.0771475315012362, 1.1837416850672902, 1.3064493293596915, 1.396811203812017, 1.475844294915801, 1.5834190413688218, 1.6883705845206747, 1.7773570794047147, 1.8316903780436222, 1.9299313039404618, 2.046461113805055, 2.17567877446047, 2.305729386495829, 2.398107788001232, 2.4291919258664665, 2.7404108409501866, 2.8539952535738085, 2.831043535118579, 2.905600587127148, 2.9644728134122804, 3.1561397163225915, 3.314863238623469, 3.3317266640511516, 3.3795823270983245, 3.478143872831689, 3.6582053975146853, 3.536367788170612, 3.833187771497617, 4.018861519663525, 3.913993085162927, 3.933222512689718, 4.2652929274604885, 4.25489508377146, 4.460020566894714, 4.39535756226767, 4.540971018807177, 4.663389213265669, 4.729368392248327, 4.953628666678516, 5.067192711177491, 0.0, 0.10093510850039976, 0.20150545408753726, 0.29284591795789905, 0.3932624066974768, 0.49841428484945866, 0.5863757632043246, 0.7077799571979656, 0.8235647106652288, 0.8680445726237406, 0.9798849465823485, 1.0979065791228209, 1.2303691484183723, 1.281889214388436, 1.385596439903536, 1.5063015583225727, 1.5591807154125272, 1.7561342536977254, 1.8437935639879504, 1.9142706431209449, 2.0074059569958256, 2.0525281418309542, 2.135434229824608, 2.299293177253648, 2.3705024919481112, 2.5031646174082045, 2.545209004861284, 2.6466411126817335, 2.792912976944125, 2.9350476790222135, 3.0863820068901986, 3.1295243913668394, 3.203953317672196, 3.319437013450771, 3.522782727600042, 3.5612034955935368, 3.638488783725836, 3.6279373755004154, 3.874463116871497, 3.9586020779394864, 3.967806412309955, 4.321840729470667, 4.225739928101624, 4.1640515453398645, 4.408585714512182, 4.552889072756996, 4.380437170267884, 4.813353286050793, 4.813355169256731, 4.784322680407702, 5.017799615407794, 0.0, 0.10083837573799508, 0.2002164123694752, 0.3003974613314447, 0.3879501280138176, 0.5104500645651392, 0.6104254460321829, 0.698162929963969, 0.8029141148743981, 0.8725259332239365, 0.9966294834350776, 1.0723145007953898, 1.21538761836221, 1.249983742437077, 1.3817249115082162, 1.5151062720555983, 1.6099694733839873, 1.7009010764514796, 1.8538921149467096, 1.9016046070475385, 1.9371156297752818, 2.163645912321988, 2.217130028162249, 2.351712475031607, 2.4632090755230376, 2.5268469838469474, 2.60148549940822, 2.612656327349032, 2.8272408204062844, 2.8636596331527, 2.8844719007816595, 3.0857966809081927, 3.3480132359239905, 3.3129065120135497, 3.442792749172254, 3.4376055334801348, 3.683965890459225, 3.667832573849522, 3.8058396406115897, 3.8204889567378597, 3.86628890553393, 4.055205190554859, 4.116391104929751, 4.257835059463132, 4.323377387801, 4.43286859931145, 4.51417702125843, 4.802312077364044, 4.675250555638708, 5.002313587968448, 4.978774974723057, 0.0, 0.09814729838584967, 0.20026119578062238, 0.3075246781203698, 0.40855143433805613, 0.49367812235190905, 0.5810229819487153, 0.6874508680034239, 0.8042509942175183, 0.9116795034632493, 0.9841191056037449, 1.1269564545654485, 1.1969004812238473, 1.2497527052606712, 1.379339388430647, 1.476895728164565, 1.6054619511428636, 1.7123828468500937, 1.8131237284646928, 1.840551904187916, 1.956438366655777, 2.1858606248845676, 2.2260432115095137, 2.2979947853078913, 2.4349004917502666, 2.443557297788082, 2.7240467466476965, 2.6964836666676164, 2.7827709339639464, 2.897903847957427, 2.950754481263424, 3.155374848133134, 3.1885877596058774, 3.3677388255894827, 3.417940011629031, 3.3588051770407827, 3.711550833844818, 3.6310952767859015, 3.76104725885037, 3.889926725151704, 4.141202991567898, 4.097141194084406, 4.146459024049082, 4.17025474646511, 4.47601113071464, 4.374064285651743, 4.621647547878368, 4.715896187413031, 4.810587922321967, 4.941466685189632, 5.039876623676831, 0.0, 0.10008112237723643, 0.20758683661716365, 0.3041161365612836, 0.41306323569109543, 0.508453336023625, 0.5938511229412118, 0.7010326613232257, 0.7861001197467918, 0.8880020777531519, 0.9694178588018246, 1.0797219984825401, 1.2164100746807118, 1.336281237868916, 1.4211988392043855, 1.518577574306286, 1.6011454071479598, 1.717777309494246, 1.786412146084785, 1.868535342426556, 2.0416218746322174, 2.0790578837581863, 2.212000310320352, 2.283194710080521, 2.3940245707782015, 2.5462663828161256, 2.651824692524252, 2.679869097668892, 2.749185913432203, 2.908646624870483, 3.0850402342437224, 3.1066061832883225, 3.2954747245422107, 3.319275187169158, 3.4212540997880234, 3.506675512013767, 3.639559142393214, 3.7441333923887288, 3.835243189563747, 3.9646422360082108, 4.007196433573106, 3.9843346662469776, 4.3767091848772255, 4.319199430373882, 4.468363764005061, 4.467176479300551, 4.65258731815927, 4.603428497459794, 4.663196152972597, 4.829665086891739, 4.9585099853164305, 0.0, 0.0994936334795373, 0.20220898159437098, 0.301808350476876, 0.3991515808385259, 0.4981329465104915, 0.599654825303622, 0.7126643417843573, 0.7932730516704166, 0.9079606498884359, 1.0053875612256769, 1.1228218346106842, 1.1925977272634518, 1.2738341398194835, 1.391072476598947, 1.4612504933638748, 1.586376814773083, 1.6745047127893737, 1.7775213230835532, 1.9015131262284481, 2.0136853131267394, 2.1196819765662593, 2.1859542743229055, 2.2861229831101055, 2.3201418297456695, 2.5472366412678626, 2.7165534226425208, 2.804680293404636, 2.8047696272090805, 2.8741581795402142, 2.895726849631508, 3.087108706095106, 3.2987201933305736, 3.2366839579967044, 3.438586728025223, 3.4748810211434047, 3.6269061949313857, 3.8140952612320036, 3.9067833628520656, 3.8243562706780203, 4.082431331260929, 4.047632278759291, 4.254575517123343, 4.196834693269421, 4.30062525104428, 4.484962781867798, 4.367223557887754, 4.83895899831472, 4.856771237035771, 5.041514352600903, 5.043599155596177, 0.0, 0.10155264222655612, 0.20052361520539158, 0.299333958006145, 0.41242017401851444, 0.48897311225188766, 0.5979231916715928, 0.7188691181686044, 0.816279639918628, 0.896971551371887, 1.0152738427943382, 1.1132712853049291, 1.1769650372357412, 1.3100163993485885, 1.391392243681998, 1.529141158507342, 1.600212840498883, 1.6865386961432367, 1.7662590285283042, 1.9632697730160813, 1.9778918021785108, 2.163737781099648, 2.1950575684410634, 2.2549119595642773, 2.2692696560594046, 2.4604706901403826, 2.6646710371872966, 2.7211202713814826, 2.818972859822927, 2.9236366115294863, 2.9646698847530377, 3.0968094949499747, 3.274423579174344, 3.2744418147361136, 3.419156765927247, 3.4491754571205475, 3.56947743936492, 3.668058310212379, 3.6554180314576667, 3.932970449081871, 3.9591345925277537, 4.114024078729779, 4.2222781306329935, 4.320015568104545, 4.587682818198413, 4.651766113775737, 4.600454149513143, 4.76171904410217, 4.919411695238803, 4.967439518662314, 4.984347535587582, 0.0, 0.1014193053303832, 0.1986435701545339, 0.2982589866255018, 0.38994481954286664, 0.49116855222809513, 0.6048590813456005, 0.7090835844778942, 0.7974004679157429, 0.9006071714711159, 0.9752469634986312, 1.10219028435868, 1.1997441459009224, 1.3251649517169388, 1.4204792253855096, 1.5741708637820098, 1.5619379939403542, 1.6862210911185325, 1.8246756612984523, 1.9094142773589757, 1.9633318750600801, 2.1549636196321837, 2.1958589945777565, 2.2160379797869276, 2.5028979776037623, 2.524529155096176, 2.6438850340884015, 2.7351917699648003, 2.7397809065098095, 2.892456989561441, 3.049145928786133, 3.0179648311283027, 3.1997836298460816, 3.3260258773967437, 3.409955845011519, 3.493874615899723, 3.5877302077321063, 3.637714173326679, 3.8448632917356877, 3.9258637669647305, 3.992313371915655, 4.052197378735659, 4.207563668956139, 4.412008540962253, 4.4602118841591185, 4.322733599162544, 4.552165729617209, 4.745681163013929, 4.810378577522408, 4.706044188060017, 5.216602534151497, 0.0, 0.09991227044856837, 0.18861283529890482, 0.30072810907782316, 0.41095044944238823, 0.4954722758647042, 0.600129822070394, 0.6850510202264674, 0.7922587116846391, 0.8759365059889571, 1.0127410005586472, 1.113381241500665, 1.2227850834621945, 1.2796430053589698, 1.3802449640781531, 1.470613823613282, 1.5842035662793623, 1.7167656632353883, 1.804600691708832, 1.8467470797514165, 2.0337184783544497, 2.0999883091396385, 2.1498512117221718, 2.281765188840263, 2.4155540362631145, 2.4395517123875714, 2.7048029969370972, 2.7146212951840463, 2.7770013033166205, 2.9503498281733735, 3.0741439856361326, 3.1917081767253763, 3.121656951729481, 3.330490913284505, 3.339728396833173, 3.4634799418082727, 3.6648842039564444, 3.739064722862316, 3.7494688638806957, 3.824763527234468, 3.9781232200736474, 4.132408337638346, 4.219059845732634, 4.336218737777202, 4.312272083415814, 4.598824525708166, 4.617853220921989, 4.783417574613426, 4.856337453148812, 4.765980300095187, 4.934195794843654, 0.0, 0.1025381301311679, 0.20998925667686053, 0.30641029944613196, 0.3990274960989488, 0.508206463943408, 0.5883308380482397, 0.708293165600139, 0.7842127896811945, 0.9388426936298078, 1.0316327534327354, 1.1078464700468875, 1.1696671793365845, 1.3278236610149101, 1.377467250743014, 1.5076982994587957, 1.6067963057605248, 1.6619122388970593, 1.8733487004719003, 1.8657518092759777, 1.9428695638166553, 2.095053082895755, 2.131285069057657, 2.3112788188866515, 2.409962022641132, 2.5390697719989888, 2.5231220016358247, 2.7028701135058553, 2.800254161470342, 2.9271077924203914, 2.9808540182013767, 3.0951925075204607, 3.1649774827960613, 3.3977439227964235, 3.4147086322307314, 3.468130121558152, 3.6535430208082462, 3.9028916848966646, 3.8033747767350725, 3.9612480514851534, 4.01311422627168, 4.114256510896639, 4.244382630870822, 4.205219530655002, 4.372681432601878, 4.481264859053103, 4.5583298497945925, 4.62090347131182, 4.893633578522854, 5.0853984720097465, 4.904152512195535, 0.0, 0.09749772135810159, 0.20005673874838192, 0.3103649885613431, 0.3917927576918656, 0.4777458322806482, 0.603630736368521, 0.6796800663554903, 0.7689770304710515, 0.8983247427637466, 1.0021954130836244, 1.1140575130342498, 1.2116059988979755, 1.2825646112664755, 1.4244232587933967, 1.4776943879854407, 1.5745049191058442, 1.6733052226769798, 1.821601542059598, 1.9044389924728369, 1.9936232398666733, 2.0554813304420074, 2.19113589641192, 2.2918274667019367, 2.40233052913413, 2.499419599345181, 2.5709843591645454, 2.70787491138931, 2.856218330835851, 2.8873394310806044, 2.994416187921892, 3.1191119116903283, 3.259258099944287, 3.438075574363916, 3.424194448987752, 3.569333880376686, 3.5310303788932464, 3.6119375439301686, 3.797130641639854, 3.9846560053554865, 3.9558869574833744, 4.084603519875461, 4.133649384593565, 4.322998176415632, 4.459183477220157, 4.474096660145216, 4.552256513907894, 4.673139141316866, 4.662863472244731, 4.911562115156994, 5.052481387472697, 0.0, 0.09722728475287488, 0.19930869904493317, 0.29848115487565874, 0.3997072057879847, 0.4942502516956157, 0.6022614359250452, 0.7002556272369876, 0.8057825051332174, 0.8918536547631757, 1.0069288377854753, 1.0823767004804885, 1.1738602833202751, 1.2736860644981343, 1.4126596349143963, 1.533161524552473, 1.5818590270401562, 1.6641581569899946, 1.788458275137319, 1.847581589619166, 2.019358955443468, 2.11644665224953, 2.164380408460233, 2.3284591891939126, 2.34949168700061, 2.583792745184707, 2.5340139449531427, 2.7479169768659313, 2.804622846989306, 2.918355693238279, 2.94875750547416, 2.9857047736713067, 3.2111066012924256, 3.1733475777308495, 3.3540312933137293, 3.5587373253268755, 3.5871052211480148, 3.6407512253340815, 3.8583218823542795, 3.7633447606661368, 4.124715208001192, 4.149381637394268, 4.172954334395816, 4.2667796643653935, 4.462382236156373, 4.469434727239026, 4.706547514185045, 4.745762242378415, 4.883033199118189, 4.956390570773669, 5.057112838770598, 0.0, 0.10075255691805184, 0.1973203177942879, 0.3060182073591766, 0.40103142269282044, 0.49868354707870516, 0.5971790471791892, 0.6985015904154294, 0.7876847699770629, 0.9398115830010358, 0.9853855010478697, 1.0571642102513836, 1.2372931127192142, 1.2731631995003967, 1.4066548915823642, 1.5421194798068019, 1.611876480973133, 1.691133808323262, 1.8202293713333102, 1.8848923820329937, 1.9866622905115774, 2.1014571661639385, 2.2139484920664407, 2.2972375596823364, 2.3109203699831213, 2.4890753169830298, 2.711346156286111, 2.705703815136475, 2.707188898400005, 2.9430926187860798, 2.9536641519959885, 3.0008314186570932, 3.2372826383918, 3.334294534821026, 3.3716493649775865, 3.5388260091831896, 3.626374309534094, 3.603868533202425, 3.7491905802483307, 3.811967002424163, 3.9179571573725243, 4.140133198586494, 4.2858704029980945, 4.3218612368004266, 4.356935168941281, 4.537289692326945, 4.754650752305717, 4.680923181632576, 4.692011463602548, 4.895519933797549, 5.121069163766884, 0.0, 0.10183127455754055, 0.19508904502156293, 0.2950769008264506, 0.391117606116692, 0.4874445791268614, 0.6047320241693533, 0.7003937149418489, 0.7828083882636196, 0.8853791068684491, 1.0104555274443223, 1.1011621707430486, 1.1975873864128292, 1.3108274776089532, 1.4094667999626649, 1.4912933718120334, 1.583550234810788, 1.7034953229728713, 1.7350830257197345, 1.8941498398738472, 1.9398981885183784, 2.0667950040147094, 2.293557051142869, 2.3391099497171415, 2.3621635997405654, 2.5168923202159466, 2.596274631942191, 2.6646752289010394, 2.703535227187176, 2.893186461343088, 2.977585511646547, 3.085747075674123, 3.143484292667048, 3.2318829357618184, 3.3571490943824656, 3.510062931967116, 3.6119354419000405, 3.6175153700550964, 3.807930305474619, 3.819638473303076, 3.9993723660928997, 4.200305027369964, 4.195183499626737, 4.317802325315263, 4.43920253693697, 4.415858049812075, 4.630778874263522, 4.699456165367814, 4.868016837403341, 4.924007825997531, 5.040994311420081, 0.0, 0.09775779009769966, 0.19848342452393086, 0.29889822917931824, 0.39970974912403706, 0.5055907463402712, 0.5841669263994231, 0.7016822652383476, 0.8095741809554444, 0.8798602639830511, 0.9950949664494305, 1.102805267837988, 1.2156706822745877, 1.3124560661108522, 1.4374150083179251, 1.5181596775517292, 1.568472746294156, 1.618447158980673, 1.7705606302572625, 1.9285888928173043, 1.9968717147917348, 2.118644923876435, 2.2642544073750233, 2.2998088885214503, 2.4174494440356122, 2.465288226952114, 2.654733455404785, 2.683083303605741, 2.8188303582486443, 2.903573407547373, 2.9673316372105547, 3.1533880416585545, 3.2349504748903346, 3.243045282050583, 3.469165353548282, 3.4817012772610108, 3.6927305618418718, 3.7656110427465164, 3.9619134479982367, 3.8313460153038172, 4.047444881861721, 4.159475546934779, 4.179360675101278, 4.204020694170471, 4.372409171771926, 4.453705597699436, 4.751920032090648, 4.740931700491772, 4.9458659092914194, 4.841621160009092, 4.69645642870931, 0.0, 0.09857485482590377, 0.1983206994320269, 0.2957693852019362, 0.4012598868919998, 0.5003282435366241, 0.6016028257238818, 0.6855654584549606, 0.7795880972831374, 0.8872890494934114, 0.9875717545202158, 1.1021645399246247, 1.2320863605599341, 1.3183981549150796, 1.442464588954532, 1.5641434552640177, 1.602736757901016, 1.6576378698901437, 1.795711901708209, 1.8538991021524163, 1.999296619082282, 2.0855566230847407, 2.2454986937118337, 2.2757147444821944, 2.476160518881049, 2.4389575516573903, 2.5767246108854875, 2.730151819815315, 2.7854801283814576, 2.85750304775203, 3.0118426873675617, 3.0402803318864104, 3.0689391021582275, 3.228409355290123, 3.2920139531491532, 3.454395436672208, 3.6388545447077103, 3.8131601774388653, 3.772533256381367, 3.8464516719202955, 4.0857064257096996, 4.109726471434327, 4.264142678002653, 4.363074020169606, 4.455236671835779, 4.462929266230091, 4.720008999411722, 4.552973310561049, 4.80694603120695, 4.9493093708525535, 5.000126105484274, 0.0, 0.1007221510490365, 0.1999806457409402, 0.29311484111280106, 0.40515726182587297, 0.4988298264646826, 0.6110956041522684, 0.7041887647904325, 0.7871540540700578, 0.9113334044706382, 0.983061633492636, 1.0994689775475028, 1.2327379371670568, 1.3113640867463725, 1.4317658209101738, 1.4739130802901732, 1.5777800917149762, 1.7221211411039135, 1.8034742724735386, 1.9551777675082713, 1.990548733086562, 2.0471490700493655, 2.2244885462572546, 2.3286743826944436, 2.3825370499519187, 2.550359911996656, 2.5305563515245386, 2.664779152154548, 2.821307059480334, 2.903000027948633, 3.007724097846025, 3.2019549934067677, 3.203842227842613, 3.372469555633556, 3.5012098321022602, 3.5238963085439154, 3.7343489522846007, 3.5864802929393047, 3.780042967772528, 3.863529343719692, 4.049685637350454, 4.041144217961225, 4.193952914253918, 4.137379513459255, 4.4030605375293295, 4.5530581377999875, 4.68890020836355, 4.7348338948829705, 4.7924521011919365, 5.015576178690925, 4.9252944881247185, 0.0, 0.10238556056892653, 0.20364278271844716, 0.2911239808426884, 0.4118760424689913, 0.49802702940491067, 0.5840118018855589, 0.7166382768357813, 0.8068279722551847, 0.8908735083394372, 1.0245087472547443, 1.1448542442264003, 1.1864765202308707, 1.2800252284097562, 1.3672183990146674, 1.506613697244783, 1.5992964426515264, 1.6575540945778922, 1.8226605255209998, 1.8887723240501473, 2.015955286575161, 2.123312023756234, 2.181361102741973, 2.327515501838467, 2.409629253522113, 2.5144004232725283, 2.6628569191390534, 2.6228121096941557, 2.853765900716853, 2.920174434819374, 2.9563415345264428, 3.232165188172781, 3.2074206077303664, 3.3703743613847856, 3.381463785684169, 3.4586945030097187, 3.710598505647119, 3.742448048080648, 4.009416797458705, 3.83148028668572, 3.972515863154059, 4.1156458488820915, 4.114035897947334, 4.254965054761894, 4.342066293608645, 4.636401313399146, 4.459525863901157, 4.626695060921746, 4.852107363394666, 4.825188697790801, 4.910055660968679, 0.0, 0.10020086976707389, 0.2015567562942752, 0.30753883098415313, 0.4031538337085354, 0.48796594732209986, 0.5870906113856773, 0.7104574659259631, 0.7887103662076019, 0.912482850303763, 1.0002084227323378, 1.0741040756716884, 1.2011492315101038, 1.3087938324576607, 1.3933801685255949, 1.5313600204431685, 1.6078878983572737, 1.719235393519128, 1.8492955707203018, 1.8660169125059496, 1.9573041568048213, 2.082362150581498, 2.2005991879852482, 2.3119711576308144, 2.387422662959979, 2.5576726300991237, 2.5609915773636165, 2.7676845666254377, 2.8161203885001926, 2.95543622679688, 3.0085421615581835, 3.1220026560120577, 3.1635828028506805, 3.3393327574698146, 3.380648072699044, 3.5982022421153754, 3.6993082916906816, 3.7203380196760785, 3.7710721785244914, 3.950580537762595, 4.112090475266617, 4.1373268694730125, 4.156227486410086, 4.349352711467, 4.5792096685857215, 4.383862488298171, 4.7722062011897055, 4.486899222458185, 4.929310395345973, 4.852891955932377, 4.95739230219181, 0.0, 0.10130202473400082, 0.19607255047294742, 0.2937892976421041, 0.4027835809436609, 0.5030273662538205, 0.5928667931040703, 0.707634345311849, 0.793713982653562, 0.8826240358741767, 0.9973952092493045, 1.1001395195229697, 1.2328464959874044, 1.3100926287955057, 1.421422244262567, 1.4810218702920521, 1.610586153207238, 1.7124638391298528, 1.8024878182737851, 1.8818421772660678, 1.9705628116074203, 2.1377159178157323, 2.196442660189446, 2.3216870821975357, 2.393338020059306, 2.5157286838206896, 2.5539730703890737, 2.6594929909404503, 2.876480522717526, 2.88249183469522, 3.0148691211176826, 3.1132061413576277, 3.2454607278169325, 3.2375574152821454, 3.3889419811524473, 3.619154733279095, 3.6464231416103963, 3.715848722708048, 3.832256348931642, 3.848856422835674, 4.0690940638348145, 4.112278148967716, 4.135474975527834, 4.333137501641426, 4.468745241562145, 4.369245713326707, 4.634404644752877, 4.5416137974870745, 4.836824305893437, 4.797938615508324, 4.904223454323476, 0.0, 0.10252753130403375, 0.19908648279127794, 0.2952304097916258, 0.39025377879045, 0.48982448016527347, 0.6171255484178926, 0.6879490012146384, 0.7793746994542345, 0.9240192193281389, 0.9997030032468703, 1.1092250859115715, 1.1639623823494867, 1.2975995840277792, 1.3791176686655626, 1.4605745146695002, 1.6093406661915544, 1.7369304376440733, 1.7780494473165422, 1.908471603037266, 1.9624105343541702, 2.086172971455719, 2.2288999394215727, 2.2869772234561863, 2.4161208819059703, 2.5429236458638114, 2.587643619124366, 2.7197476606392437, 2.7879942700641287, 2.9276041246355695, 3.055832946226745, 3.1847617997394604, 3.2113386047946206, 3.3116304142737483, 3.4734991459381326, 3.4278119782290686, 3.597539700162136, 3.7468193953022046, 3.844991293446482, 3.8601964846258614, 4.0412599661526825, 4.118376801952323, 4.159111415497384, 4.184390502256021, 4.314283520082346, 4.399950001394631, 4.6871386390773875, 4.693499968725049, 4.93386859961274, 4.911870166437469, 4.804016070182637, 0.0, 0.10446438940303139, 0.20162521720287635, 0.2997588592312636, 0.3836700285257963, 0.5121042155006471, 0.6054680504864821, 0.6859884502669016, 0.7927653500985716, 0.9449336997615881, 0.9818982871563161, 1.0719728063349774, 1.2543685742857564, 1.3135108743936517, 1.3504909932933118, 1.509911799924806, 1.5423416826010103, 1.7026112990673699, 1.835567833282929, 1.9340640440792511, 2.0015264054008486, 2.1149490679687397, 2.1651612411196215, 2.324186040495791, 2.3823464090942927, 2.5556432244274285, 2.6158513764005176, 2.6373784829788427, 2.789970560660809, 2.892018693747173, 3.069003289205516, 3.142513002142768, 3.213957597774839, 3.2696050328527364, 3.4477482015295693, 3.4627360112094583, 3.470352747311768, 3.7005952058212035, 3.812000687236033, 4.002907560205818, 4.028440007719171, 4.093963553497908, 4.253097350125372, 4.378647455194216, 4.433194323410864, 4.454832663244933, 4.698449346418753, 4.75172138479951, 4.672249887912779, 4.754085715869402, 5.049558618363191, 0.0, 0.09948117370781591, 0.19872655595985816, 0.29831847178485155, 0.4064566449796021, 0.5027022201752629, 0.5914576887234794, 0.7141184215315174, 0.8217973109885077, 0.8913087547382845, 1.013914948659668, 1.1250028442074855, 1.2084378633332364, 1.3018621131044357, 1.423539104098541, 1.5051629156214754, 1.6268103674516905, 1.650040883726835, 1.8032803040740448, 1.9467217929113891, 1.9735825830505045, 2.1325984324903184, 2.2505398822016542, 2.262218290049358, 2.395362044143722, 2.3564759520251726, 2.5511921507847246, 2.74872580019652, 2.8065837212787845, 2.869906283902573, 2.970035293762604, 3.160323285153373, 3.2320617011888215, 3.2014641277082134, 3.2824475003168447, 3.4945581450653407, 3.6787998124732875, 3.6774290202305435, 3.8092936303640244, 3.9302177407825365, 3.9375611006778044, 4.274988745722958, 4.186977138167598, 4.260497185079494, 4.368280304074117, 4.5370163724755, 4.73014476373306, 4.58165772363065, 4.771122808838336, 4.785003257962961, 4.9277700859999385, 0.0, 0.10347868469085608, 0.205886730390647, 0.30500831176475085, 0.41207643632502017, 0.5230247499959119, 0.6101766954836334, 0.7126251422476361, 0.8058216636399992, 0.8984454282566272, 1.0021022189225888, 1.0749627108542783, 1.2198251062917016, 1.3141369677907095, 1.4336162306068163, 1.4799347419611344, 1.5891573024505055, 1.6971467075753301, 1.841391149750706, 1.9387899976355876, 2.018896537276483, 2.081726105929294, 2.2674509340092452, 2.2791082636105457, 2.3474178553049074, 2.4708420269190654, 2.6193552515657057, 2.728337500727995, 2.847417164332795, 2.929575406496509, 3.0353178180966216, 3.1060681210545074, 3.230080898271087, 3.2215273835915683, 3.452300046614595, 3.460758344204135, 3.50800910380089, 3.798816060090095, 3.686615816410154, 3.875230960595129, 3.92324062337741, 4.073444667439043, 4.2061142360649795, 4.352905364030205, 4.319690124516154, 4.359831829611402, 4.4874118151806455, 4.582280004642213, 4.815217241713723, 4.9199877414868896, 4.8673823255156, 0.0, 0.09875691088024798, 0.19922194235845728, 0.298167657348029, 0.39953145615043534, 0.4740077979581224, 0.6087000620522942, 0.6988488683333743, 0.8036910050871211, 0.8933890607376229, 0.9919880743721533, 1.0965943134187783, 1.1966522497305907, 1.3292970603350176, 1.397889036502364, 1.4689935901312479, 1.6043669151958702, 1.7328808880156368, 1.8423471461705545, 1.9041779539253125, 2.0020680815250893, 2.078924234335439, 2.1363735712749303, 2.3147279536034784, 2.4827180133354325, 2.5245604108063544, 2.529117419569712, 2.774070455817613, 2.789768778289421, 2.8672692014204024, 2.9870390981274917, 3.054973192408958, 3.2244331215850295, 3.3676559968407913, 3.566840361285946, 3.6171351679866226, 3.5508828820594736, 3.6271047462859634, 3.8134929639517647, 3.8747221201190496, 4.083941772167077, 4.178363791739966, 4.183705412967122, 4.269417610915116, 4.408223276053469, 4.451256214758611, 4.72289432682389, 4.6475780953896155, 4.79721245138508, 4.920348248046135, 5.023923875202963, 0.0, 0.1014516542931639, 0.19872494843061067, 0.3012161865532385, 0.396953919233062, 0.49522282576640114, 0.6041652797866105, 0.7060431094937051, 0.7913444031545717, 0.8767142202874968, 0.9935923337264277, 1.090571039627791, 1.1583148571884663, 1.3141460171999206, 1.424962628138151, 1.5118267033196957, 1.5997419581974337, 1.6811261717955686, 1.813333900005514, 1.9129841825908156, 2.003304219218695, 2.136577995705681, 2.235736609760283, 2.22242590385329, 2.3655050149712706, 2.4977943664859987, 2.5922866642938214, 2.6979593502400268, 2.7134907256610967, 2.843764562864008, 3.0546991723107793, 3.1130910445753863, 3.1976944300754684, 3.362237830446815, 3.4004356767677306, 3.534093738688257, 3.654589633841729, 3.7338232392293214, 3.7808391500508076, 3.951009539977508, 4.08735013544387, 4.0095854386748595, 4.2794227404302285, 4.352176667047029, 4.429727061890478, 4.636062129150221, 4.626861021599613, 4.781368889157011, 4.888701179412077, 4.741624318200049, 4.9338212113010576, 0.0, 0.09851468179345045, 0.2006057190620963, 0.2960558576274585, 0.395686717994215, 0.5156025680595505, 0.5960017733856995, 0.6966386834642945, 0.8031443387015474, 0.8958977200810159, 1.005329745076082, 1.0964879967130081, 1.17224460816997, 1.3018236507716416, 1.4066173313428194, 1.5314358284131353, 1.5811032607215156, 1.7164227120607725, 1.7969481304033146, 2.013311153080323, 1.98638755272153, 2.140471468472643, 2.177704649090158, 2.213622491301268, 2.3658357630165807, 2.472007298523513, 2.6354843539688217, 2.722335287758817, 2.7457113436693903, 2.9237259448911255, 3.000469122368728, 3.15372230110112, 3.282220580587323, 3.3392990821680266, 3.34289435074044, 3.527056174774634, 3.6003950212079565, 3.7103217537575497, 3.8549667245739165, 3.840017965929563, 3.9381609949616214, 4.10064443485339, 4.209402530057792, 4.168554457769529, 4.418282854399571, 4.615937808548024, 4.562853795635652, 4.713383570599271, 4.915590300384672, 4.752527951199723, 5.134981968101979, 0.0, 0.1004910855573333, 0.19724207428427082, 0.2979571239943762, 0.39913669439251054, 0.5130845207547077, 0.6093586473378535, 0.705955936608087, 0.7983050516151324, 0.9331426655214171, 1.0020402176852643, 1.0972476616143083, 1.2135381053897993, 1.2925937821985969, 1.3890571416746036, 1.4595725820106267, 1.6013629643397562, 1.7176968745546555, 1.7602792409270733, 1.9087037959692192, 2.019979988329459, 2.135970317757319, 2.170102548819731, 2.331173939381807, 2.4070519268955333, 2.5067987737221737, 2.603952403152702, 2.6649170912295226, 2.8399448486166294, 2.8888998434700857, 2.9965718506001395, 3.1333759865348703, 3.196556230224509, 3.264678192058712, 3.354307580807247, 3.5516929791776946, 3.4640959042813595, 3.613158064309454, 3.7988136536580988, 4.036292669910213, 3.893594724258474, 4.10659136529475, 4.209662945741612, 4.196090525418685, 4.426656399433409, 4.54035790482603, 4.528967804752869, 4.6518056605725375, 4.823578071973394, 4.892781669407106, 4.9968233293680795, 0.0, 0.09590999421235488, 0.19852510521154954, 0.3037893024602284, 0.39588971250074995, 0.5062973906612684, 0.5979050913461242, 0.6708889544235807, 0.7883687349973059, 0.8940412654533404, 0.96933875442668, 1.0842429537204137, 1.2091884455201203, 1.3340512818196326, 1.398096006255065, 1.5239063236853716, 1.6671766434359911, 1.713809160659696, 1.7640794051001694, 1.9224354645069424, 1.9415839175096798, 2.107762623379866, 2.296318719167792, 2.2633516304808907, 2.3610517579443995, 2.560815203115092, 2.5166826924775214, 2.6948459777399987, 2.7974688848405287, 2.8688280889492708, 3.0709543426809263, 3.010946288198563, 3.120626186017804, 3.2112288606802704, 3.316364630732725, 3.4034423696278955, 3.57870735453847, 3.7434518839531576, 3.7944314712765426, 3.8477497763108306, 4.049038895220596, 3.921019284077753, 4.179538613748942, 4.272162897232793, 4.397125559860839, 4.601911202685421, 4.545243079331304, 4.587970513465299, 4.8620392062121605, 4.922592967802679, 5.01630492719245, 0.0, 0.09881490006283739, 0.1955668271682212, 0.2998839123568869, 0.40456725533119736, 0.49533213998014497, 0.5899659372303997, 0.7181445039202891, 0.799627710284017, 0.894529556468472, 1.004277163078005, 1.1261226587611715, 1.2230102373957354, 1.3154448213009908, 1.41845451817279, 1.5287828757961868, 1.5723354040077584, 1.6631401244633999, 1.827702938839229, 1.8754606866530903, 2.0691733551426794, 2.1072542963876897, 2.1742757337361547, 2.3103882044799957, 2.3631961379535067, 2.5434370636831085, 2.6505881900446324, 2.800633578173399, 2.801153490368622, 2.872660176251341, 3.012383612441426, 3.0394772394381153, 3.238432287054863, 3.2518241696417842, 3.390662853437492, 3.449020412528629, 3.572730242277582, 3.7838575262074308, 3.8565073706055983, 3.7011135419887964, 3.916074390464477, 4.0659072949316855, 4.238049216994546, 4.298846461042513, 4.3416417058430925, 4.431906633628477, 4.601722665904945, 4.70063897032543, 4.934820414494012, 4.917762258974208, 5.026170051064902, 0.0, 0.0966995905364467, 0.20366795897535797, 0.3038020537769256, 0.3987180593032661, 0.4998748678752881, 0.5967086908652974, 0.7089139181880136, 0.7987636080524914, 0.9000447992687479, 0.9434107633742617, 1.09654075118972, 1.1816978512061949, 1.2695952242510158, 1.3996218240733789, 1.497727561676533, 1.6527800272593083, 1.6942817566060668, 1.814302684480079, 1.8938526115604948, 1.998781064035606, 2.123882317389621, 2.1517276106823737, 2.272532908221194, 2.3667982084504717, 2.4428849069778753, 2.548916716093726, 2.647134955024375, 2.906771236313472, 2.8835683466056516, 2.988223128519465, 3.128063485722092, 3.2245154622040335, 3.249988923599328, 3.4351871223466857, 3.5108926823387128, 3.5916124078183413, 3.624287304848051, 3.851881409958813, 3.9205543915355388, 4.0766417113761495, 4.181231166171943, 4.294803398370345, 4.297080081575286, 4.436820938503156, 4.377373323658433, 4.568564775885754, 4.653147302165642, 4.7740775547412095, 4.883237494743875, 5.014945058670684, 0.0, 0.09981838952582184, 0.19589469891859523, 0.3018987493201056, 0.39112951838568094, 0.5013213015745565, 0.6021071689311481, 0.69256048678542, 0.7546923237942633, 0.8969588412599865, 1.0357656156658703, 1.1330964858471329, 1.163060141150003, 1.2942180489642436, 1.3879732998431613, 1.5230580382360088, 1.625113337315688, 1.7024411491292104, 1.7957990632079321, 1.9069253122186625, 1.9646240643481354, 2.069309882669362, 2.1983218393722366, 2.3450054413142327, 2.4401931182539567, 2.5127613763329375, 2.598003380259891, 2.593712603482637, 2.7248199708596994, 2.8780057674917088, 3.006268997553572, 3.0506721380383337, 3.2440689182572937, 3.3161401592889317, 3.44408360429663, 3.430067329691264, 3.657723186745764, 3.797799544176276, 3.792203441926007, 3.8213828656831517, 4.057614523883344, 4.151960714651556, 4.293121881613673, 4.163822903893269, 4.301463011341022, 4.425834163882656, 4.54110970026122, 4.624286986858842, 4.807719439110065, 4.950125712823857, 4.893751664410709, 0.0, 0.10102232567601699, 0.2028815701865292, 0.2997824963426518, 0.39657898025491095, 0.5033052166868024, 0.5885055510103236, 0.68143807407902, 0.8169552852329875, 0.9226801352914431, 0.95014240813099, 1.0886608531703226, 1.180135854014613, 1.2702792952412765, 1.3664065080775827, 1.5217220967117007, 1.5801724868485039, 1.719491895926552, 1.7691307429106704, 1.9253322234998307, 2.043784663570294, 2.071278720200926, 2.1602929342878805, 2.257063471935534, 2.367458317914179, 2.5027434117072542, 2.6463705143647838, 2.74415252797678, 2.7857033483568934, 2.8836956795492705, 3.0469561768560824, 3.084401318181427, 3.210363041913948, 3.2553760732418806, 3.3117932876802403, 3.3993603195668096, 3.683762631890334, 3.6432399744950663, 3.825342855415819, 3.7715882476131846, 4.077145085640473, 4.072447241752823, 4.207938322202784, 4.37074696997908, 4.3555446766946915, 4.551249972527627, 4.490689072371957, 4.715645280879633, 4.776062449056452, 4.958497741070268, 5.037170229709176, 0.0, 0.0991336672485255, 0.1958490200089765, 0.29330602392802985, 0.3976602182775669, 0.48184410414058126, 0.6064358845853494, 0.6925749514006255, 0.8005813564105059, 0.8898919214180544, 1.0331513446334812, 1.087472600081498, 1.1734971148930118, 1.3102580720549883, 1.3754757206911694, 1.4961925006335557, 1.6383822666829078, 1.6848801512532054, 1.813935250337007, 1.9322139255922404, 1.999287315211432, 2.119937941500083, 2.2441261395539995, 2.2890106378547075, 2.42703103931874, 2.5231350590954573, 2.592537838713266, 2.7402454066252266, 2.762537988210454, 2.9160088931681267, 3.0248808390397848, 3.067643529115587, 3.2470387104386855, 3.4238386115358908, 3.339720283561757, 3.4700784573303345, 3.480649591998065, 3.7178899534826058, 3.7885327903093895, 3.8422498734745423, 4.0977294455057764, 3.9217243808759275, 4.272023018978449, 4.306720813219564, 4.398934106164255, 4.37328181286895, 4.611034829132711, 4.612938806788734, 4.7206807985014, 5.039169692590597, 4.877212099329479, 0.0, 0.09753618580437794, 0.19471481231267276, 0.29751213093313245, 0.3929316131635788, 0.4962431307696796, 0.5974811087073311, 0.6878828689328992, 0.7882254321861751, 0.8966480404073648, 0.9829638423225485, 1.1006131545464006, 1.2307999089403074, 1.348831161359596, 1.3627826174885243, 1.5063472426372309, 1.6216250459346901, 1.7290955017362553, 1.7556879242018881, 1.9354627651712197, 1.9410738415865405, 2.0849695836528883, 2.273377458936818, 2.2641808897210063, 2.342054286791301, 2.485871737925436, 2.624392594454634, 2.7080500720594456, 2.8068426619172766, 2.8917018372110825, 2.990738629258345, 3.051887073031494, 3.2817833317201934, 3.3821449433081208, 3.4512820166288405, 3.5032948242356263, 3.6586096850180057, 3.6724360430813494, 3.856385519606557, 3.8561743381250553, 4.131902177500279, 4.304376590821394, 4.115900157126454, 4.207270265853842, 4.354445001162532, 4.46017091119891, 4.673870820946495, 4.775409354231531, 4.6278087890575375, 4.93536355477647, 4.936870580592065, 0.0, 0.10086016309812197, 0.19586777347019876, 0.2947342638047642, 0.41437297605152196, 0.49603449199716837, 0.5940183939654369, 0.710062760584729, 0.7906869182074725, 0.9059782007540712, 1.0139049041500108, 1.1016958141430089, 1.1877489420318577, 1.2920841118651465, 1.396570049559743, 1.5314779119984019, 1.5732655184919375, 1.7196119101944116, 1.8414849958567319, 1.9312212727036249, 1.979009989424555, 2.1617320353957283, 2.2067115103587644, 2.4108051801349593, 2.4036660228127293, 2.554932626974868, 2.57985794819222, 2.6461390919431333, 2.766802584852383, 2.8677049120361846, 3.001408522968976, 3.1172694702218497, 3.3463962214711676, 3.3281675618225535, 3.377452334021306, 3.594496439364296, 3.6511695772751764, 3.7359774478766976, 3.7566016556032884, 3.8911469996475816, 3.991581526111565, 4.09744259760373, 4.1476043456576335, 4.354170516000331, 4.4928649579539846, 4.450061835190561, 4.564309300632347, 4.720750802823114, 4.903506300181274, 5.020520527998898, 4.971440126399601, 0.0, 0.10244994850858992, 0.19741371683666115, 0.29404251905552237, 0.4006799006399102, 0.4964111170282174, 0.6206673974947938, 0.6849880054211801, 0.8054236726374051, 0.9052383200068643, 0.9960258840012932, 1.1048031724366152, 1.1778876804500933, 1.2877691305683374, 1.3732686619693646, 1.48100752539115, 1.6406771473591024, 1.6886817337042235, 1.7480707952335188, 1.905590530042023, 1.9247220058681247, 2.0881878405579366, 2.2328620805495403, 2.3478513497340154, 2.3319515214895454, 2.492062194540539, 2.682145605175931, 2.687348057456299, 2.794984268614832, 2.940167942269399, 2.9894747722371005, 3.1106619865713645, 3.2420758244828, 3.212139489170755, 3.373618345196912, 3.5537284420293425, 3.5802718961316407, 3.7930943188618094, 3.7660174721947053, 3.914370036652206, 3.9119022474228746, 4.019019442480449, 4.263114229377043, 4.339151348474447, 4.355156958412384, 4.5398458841600995, 4.548688111054645, 4.742946922059204, 4.829300447714341, 4.888250122538419, 5.036343823536201]

sns.set(font_scale=1.2)
sns.set(rc={'figure.figsize':(8,4), 'axes.facecolor':'white', 'figure.facecolor':'white',"figure.dpi":300 })
params = {'legend.fontsize': 'large',
          'figure.figsize': (7, 4),
         'axes.labelsize': 'x-large',
         'axes.titlesize':'large',
         'xtick.labelsize':'large',
         'ytick.labelsize':'large'}
pylab.rcParams.update(params)
df = pd.DataFrame({'mu': mus,
                   'sigma': sigma,
                   'angle': angle})
sc = plt.scatter(df.mu, df.sigma, s=40, c=df.angle, cmap='Greens')
plt.xlabel("Length of mean vector")
plt.ylabel("Average standard deviation")
plt.colorbar(sc)

# %% [code]
